# Supplementary material for: Extracellular vesicles derived from Krüppel-Like Factor 2-overexpressing endothelial cells attenuate myocardial ischemia-reperfusion injury by preventing Ly6Chigh monocyte recruitment
Source: Theranostics. 2020 Sep 18;10(25):11562–79. doi: 10.7150/thno.45459 (PMC7545985; doi:10.7150/thno.45459)
Supplement: Supplementary file 1 — Supplementary figures and tables. [file thnov10p11562s1.pdf]

## Supplementary Materials

### Supplementary Methods

#### *Cell experiments protocol*

The human umbilical vein endothelial cells (HUVECs) were cultured in endothelial cells (ECs) culture medium (Science Cell, 1001) supplemented with 10% fetal bovine serum (FBS, Science Cell, 0025), 1% endothelial cell growth supplement (Science Cell, 1052) and 1% Penicillin/Streptomycin (Science Cell, 0503). The cultures were maintained at 37 °C in 5 % CO<sub>2</sub> and 95 % humidity. Culture medium was changed every 3 days. HUVECs between passage 3 to 6 were used for the subsequent experiments.

In order to simulate laminar flow circumstance of vessel, in according to previous study described<sup>13</sup>, HUVECs were inoculated on fibronectin-coated Thermanox coverslips (NUNC, Napierville, IL) in ECs culture medium. 24 hours later, CellMax Quad positive-displacement pump (Cellco, Germantown, MD) was applied in a parallel plate-type flow chamber with steady flow (25 dyne/cm<sup>2</sup>) to create shear stress.

The mouse coronary endothelial cells (MCAECs) were isolated from mouse coronary endothelium according to the protocol and video. C57BL/6 mice were purchased (4 weeks of age) from the Model Animal Research Center of Nanjing University, and were injected intraperitoneally with 0.1 ml of Heparin to prevent blood coagulation and then were anesthetized by 1.5% isoflurane inhalation. Remove carefully heart and put into in a beaker with 1× Krebs's. The heart tissue was digested with enzyme solution and conjugated with magnetic beads that took rat anti-mouse CD31 antibody. MCAECs were gained through magnetic activated cell sorting. MCAECs purity test was performed by staining cells with an endothelial cell surface marker CD31 and Dil-acLDL. The percentage of positive cells which exhibited color was over 90% in MCAECs. Such a result indicated that the technique was performed successfully.

Murine macrophage RAW264.7 cells were bought from the American Type Culture Collection and cultured in DMEM with high glucose supplemented with 10% FBS and 1% Penicillin/Streptomycin. The cultures were maintained at 37 °C in 5 % CO<sub>2</sub> and 95 % humidity.

The primary BM-derived macrophages (BMDMs) was extracted from C57BL/6 mice (4 weeks of age). First, mice were suspended in alcohol and bacterial femora were separated into icy PBS. Next, both joints were cut in clean bench and RPMI 1640 medium was injected into BM cavity for cells lavage. Collected cells were washed with PBS and cultured with RPMI 1640 medium supplemented with 10% FBS, 1% Penicillin/Streptomycin and 20ng/ml M-CSF for seven days. Culture medium was changed every 3 days. The adhesive cells were BMDMs.

#### ***Recombinant lentivirus vector assembly and transduction into ECs***

In the present study, we first constructed a GV358 vector (Ubi-MCS-3FLAG-SV40-EGFP-IRES-puromycin) carrying Krüppel-Like Factor 2 (KLF2) cDNA and was co-transfected with lentivirus backbone plasmid into HEK293A cells to produce the recombinant lentivirus vector Lv-KLF2. Another GV358 vector without KLF2 cDNA was used to generate empty viruses as controls (empty vector). ECs were cultured at a density of  $1 \times 10^6$  cell/ml in six-well plates overnight. The lentiviruses ( $1.5 \times 10^9$  TU/ml) were diluted with 1ml of complete medium containing HitransG P (1  $\mu$ g/ml, GeneChem, China) and then added to ECs. After transfection for 12 hours at 37 °C, the medium was changed to fresh virus-free medium. Continually culturing for 72 hours, we could detect successfully transfected cells presented green fluorescence (GFP positive) with a fluorescence microscopy (IX 53, Olympus Corporation, Japan). Next, the puromycin (5  $\mu$ g/ml) was applied to the culture medium to remove negative cells, and the selected cells were KLF2-transfected ECs. The KLF2 expression levels were measured by quantitative reverse transcriptase polymerase chain reaction (qRT-PCR) and western blot.

#### ***Labelling of exosomes with PKH67***

To observe the internalization of exosome into monocytes, extracellular vesicles (EVs) were labeled with PKH67 dye (Sigma) according to the manufacturer's instructions and washed with PBS followed by centrifugation at 100,000 g for 1 hour at 4 °C. For vivo experiment, the PKH67-labeled KLF2-EVs (3 $\mu$ g/g) was injected intravenously into I/R injury mice. After 24 hours, BM cells lavage was performed for flow cytometry analysis. For vitro experiment, the PKH67-labeled KLF2-EVs (30  $\mu$ g/ml) was co-cultured with RAW264.7 cells. After 12 hours, the cells were washed with PBS and stained with DAPI (Ribobio). Finally, the cells were photographed with a confocal microscope (Olympus FV1200).

### ***Evans blue and 2,3,5-Triphenyltetrazolium Chloride (Evans blue/TTC) staining***

Briefly, 3 days following ischemia/reperfusion (I/R) injury, mice were anesthetized and the left anterior descending (LAD) coronary artery was re-occluded at the previous ligation and aorta was ligated at root, and then 0.1 mL of 1% Evans blue (Sigma-Aldrich, St. Louis, MO, USA) was injected into the left ventricular (LV) cavity. The heart was quickly excised, washed with normal saline and immediately frozen. Afterward, the heart tissue was cut in short-axis direction at 1mm thickness and were incubated at 37°C in 1.5 % 2,3,5-triphenyltetrazolium chloride (TTC; Sigma-Aldrich) for 15 minutes. The heart pieces were unfolded in glass slide and digitally photographed. LV area, areas at risk (AAR), and infarct size (IS) were determined by computerized planimetry and comprehensively analyzed in serial sections of each mice using Image J software (version 1.38, National Institutes of Health, Bethesda, MD, USA).

### ***Histology***

Histology of hearts was assessed on day 3 after myocardial I/R. Hearts were arrested in diastole late term with intraventricular injection of 10% potassium chloride (KCl). The heart was quickly excised, washed with normal saline and were fixed with 4% phosphate-buffered formalin. After gradually dehydration and embedded in paraffin, the tissue was cut into transverse sections at 5µm thickness.

For H.E. staining, tissue slices were stained with hematoxylin and eosin to analyze the global heart morphology and inflammatory cell infiltration. For inflammatory cell infiltration analysis, we randomly selected ten fields (400× magnification) within the infarct zone of each heart. The percentage of inflammatory cells was evaluated by counting the number of inflammatory cells cellular nuclei and compared with the total number of cellular nuclei in the same view of field.

For Masson trichrome staining, tissue slices were stained with Masson trichrome or Sirius red according to the manufacturer's instruction. To assess scar area, we digitally photographed the heart tissue slides and calculated the ratio of the collagen (blue-stained) area to the total tissue area. The collagen-rich border zone of the vessels was excluded from the analysis.

For immunofluorescence staining, the deparaffinized tissue slides were boiled in citrate buffer at 100 °C for one hour for antigen retrieval and then were blocked in 1 % FBS at room temperature for one hour followed by overnight incubation with primary antibodies at 4 °C. To determine Ly6C<sup>high</sup> and Ly6C<sup>low</sup> macrophages distribution, we used a double staining with FITC–conjugated F4/80 antibody (Invitrogen, USA) and PE–conjugated inducible Nitric Oxide Synthase (iNOS) or CD163 antibody (Invitrogen, USA) in conjunction with DAPI. Images were captured and processed using a fluorescence microscopy (IX 53, Olympus Corporation, Japan). Count and calculate separately F4/80+iNOS<sup>+</sup> cells ratio and F4/80+CD163<sup>+</sup> cells ratio in three fields (400× magnification) from five animals with each treatment.

### ***Echocardiography***

Cardiac function was evaluated professional technicians using Color Doppler Echocardiography (VEVO 1100 Imaging system; VisualSonics Inc). Mice were under light anesthesia and two-dimensional short and long axes imaging were acquired to calculate LV functional parameters. LV end-systolic diameter (LVID; d), LV end-diastolic diameter (LVID; s), interventricular septal thickness (IVS) and LV posterior wall thickness (LVPW) (end-diastolic and end-systolic) were measured from at least three consecutive cardiac cycles on the M-mode tracings. LV fractional shortening (FS %) was determined as  $[(LVID;d - LVID;s) / LVID;d] \times 100$ . LV ejection fraction (EF) was calculated as:  $EF (\%) = ((LV\ Vol; d - LV\ Vol; s) / LV\ Vol; d) \times 100$ .  $LV\ Vol; d = ((7.0 / (2.4 + LVID;d)) \times LVID;d^3)$ ;  $LV\ Vol; s = ((7.0 / (2.4 + LVID;s)) \times LVID;s^3)$ .

### ***Migration***

Migration experiments were performed through Transwell experiment and cell scratch wound healing assay. For Transwell experiment, RAW264.7 cells/BMDMs were resuspended in RPMI 1640 medium containing 10% FBS and 5×10<sup>4</sup> cells were seeded on a gelatin-coated polycarbonate membrane with 8-mm pores. Migration was induced by the addition of monocyte chemoattractant protein-1 (MCP-1, 10ng/ml, Invitrogen, USA). After 6 hours, non-migrating cells were removed and the polycarbonate membranes were fixed and stained with Giemsa dye. The number of migrated cells was calculated in 200× high-power field. Experiments were repeated at least three times. For scratch wound healing assay, RAW264.7

cells/BMDMs were seeded in six-well plates and culture until confluent. Using a yellow pipette tip make a straight scratch in one direction, and gently wash the well twice with medium to remove the detached cells. Culture cells for another 48 hours and fix the cells with 4% paraformaldehyde for 30 min. Finally, take at least three photos of each well on a microscope and measure length using software.

#### ***Quantitative reverse transcriptase polymerase chain reaction (qRT-PCR)***

Total RNA was extracted from frozen or fresh tissues and cells with TRIzol<sup>®</sup> Reagent (Invitrogen) and reversely transcribed into cDNA with the Transcriptor First Strand cDNA Synthesis Kit (Roche LifeScience) for mRNA and miRNA. The expression levels of genes were quantified with the SYBR Green Reagents Kit (Roche LifeScience), and was normalized to that of the internal reference gene GAPDH or U6 to calculate the  $2^{-\Delta Ct}$  value. Data were showed as the mean  $\pm$  SD from at least three repeated experiments. The primers used are listed in Table S9.

#### ***Western blot***

The total protein was extracted from tissue or cells and boiled with loading buffer for 5 minutes. Protein electrophoresis was conducted using TGX FastCast acrylamide Kit (BIO RAD Laboratories Inc.), and then transferred to PVDF membrane (Millipore, Bedford, MA, USA). After blocking in 5% dry milk, the membrane was incubated with primary antibodies (1:1000 or 1:500). Next, the membrane was washed in Tris-buffered saline with Tween 20 (0.1%) (TBS-T) for least three times and was incubated with horseradish peroxidase-conjugated secondary antibodies (1:10000). Detection was performed using ECL Prime (GE Healthcare, Logan, UT, USA) according to the manufacturer's instructions. The antibodies used are listed in Table S10.

#### ***Flow cytometry analysis***

For tissue cytometry analysis, we harvested the whole heart and cut infarct tissue from left ventricle. Then single-cell suspensions of tissues were obtained using gentle MACS<sup>™</sup> Dissociator (Miltenyi Biotec). Samples were resuspended in staining buffer (R&D Systems) and stained with CD11b-FITC (BD Bioscience) and Ly6C-PE (eBioscience) for 30 minutes at 4°C. Flow cytometry was performed with FACS Aria flow

cytometer (BD Bioscience), and data were analyzed with FlowJo software (TreeStar, Ashland, OR). For flow cytometry data analysis, we used percentage to evaluate Ly6C<sup>high</sup> and Ly6C<sup>low</sup> monocytes/macrophages. For example, in heart tissue, percentage represented Ly6C<sup>high</sup> or Ly6C<sup>low</sup> macrophages number divided by all heart viable cells number, and in peripheral blood, percentage represented Ly6C<sup>high</sup> or Ly6C<sup>low</sup> monocytes number divided by all blood viable cells number. For FACS gating strategy, we combined fluorescence and intrinsic properties at the same time. First plot gating according to FSC forward scatter for live cells, and then use CD11b and Ly6C to delineate monocyte phenotype subsets. The boundaries between "positive" and "negative" staining cell populations were defined with isotype control.

#### ***Enzyme-linked immunosorbent assay (ELISA)***

Blood was drawn from mice under anesthesia by removing eyeball with a syringe pre-loaded with 600U/ml heparin anticoagulant, and was centrifuged at 300g for 5 min at 4 °C for depart serum from cell. IL-1 $\beta$ , IL-10, CCL2 and CX3CL1 concentration was determined with specific ELISA Kit (MultiSciences), and normalized to the volume of blood samples.

#### ***Total RNA extraction and microRNA microarray***

The total mRNA in EVs was extracted by using TRIzol<sup>®</sup> Reagent (Invitrogen) according to the manufacturer's instructions, and RNA purity was checked with the NanoPhotometer<sup>®</sup> spectrophotometer (IMPLEN, CA, USA). RNA concentration was measured with Qubit<sup>®</sup> RNA Assay Kit in Qubit<sup>®</sup> 2.0 Fluorometer (Life Technologies, CA, USA). RNA integrity was assessed with the RNA Nano 6000 Assay Kit of the Agilent Bioanalyzer 2100 system (Agilent Technologies, CA, USA). Microarray hybridization and analysis were performed using Illumina HiSeq<sup>™</sup>2500/MiSeq, based on the miRBase database. The data output was received in Excel spreadsheets, and microRNA family analysis, GO enrichment analysis and Target gene prediction results were demonstrated in plots of Venn (Figure 7A), Volcano (Figure 7B), Heatmap (Figure S11A) and Bubble map (Figure S11B). Three duplicates of EVs from KLF2-EVs group and vector-EVs group were sequenced.

#### ***Prediction of target genes and Dual-luciferase reporter assay***

The potential target genes of the miRNA24-3p (miR-24-3p) were predicted with TargetScan7.1 and mirdbv5. The sequences of miR-24-3p (UGGCUCAGUUCAGCAGGAACAG) between mouse and human were highly conserved. The dual-luciferase reporter was constructed with either wild-type or mutant promoter. The respective mRNA sequences of C-C chemokine receptor type 2 (CCR2) mRNA 3'-UTR segment (5'...GUCUUCCCUGAAUUGAGCCAAAAAUGUUCUUCCCU... 3') and its respective mutant segment (5'...GUCUUCCCUGAAUCAUUCUAAAAAUGUUCUUCCCU... 3') were amplified and corresponding cDNA segments were inserted into the pRL-TK vector (KeyGEN, China). Cultured HEK293 cells were transfected with these vectors as well as miR-24-3p mimic, miR-24-3p inhibitor or nonsense stem-loop using Lipofectamine (Invitrogen, USA). After 48 hours, we detected and analyzed the luciferase activity in the use of Dual-Luciferase® Reporter Assay System 10-Pack (Promega, USA). The relative activity of the reporter gene was compared among these groups to determine the target of microRNA. Three replicates were performed.

#### ***Transfection of miRNA mimics and inhibitors***

RAW264.7 cells were transfected with the indicated miR24-3p mimics (50nM, Ribobio, miR24-3p inhibitor (100nM, Ribobio) companied with KLF2-EVs using Lipofectamine 3000 (Invitrogen) according to the manufacturer's instructions. We used scrambled pre-microRNA as a negative control (NC), and the effect of transfection was examined by qRT-PCR. Next, the cells were seeded to measure migration with MCP-1.

Figure S1

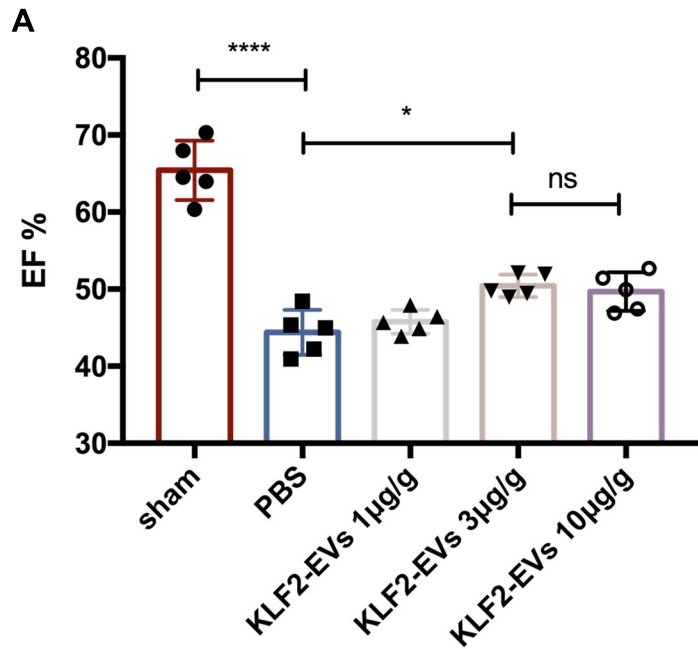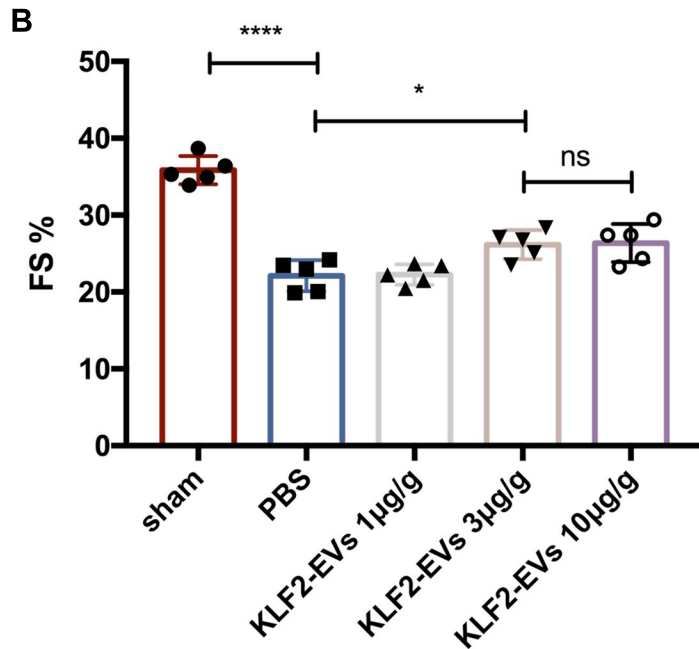

Figure S2

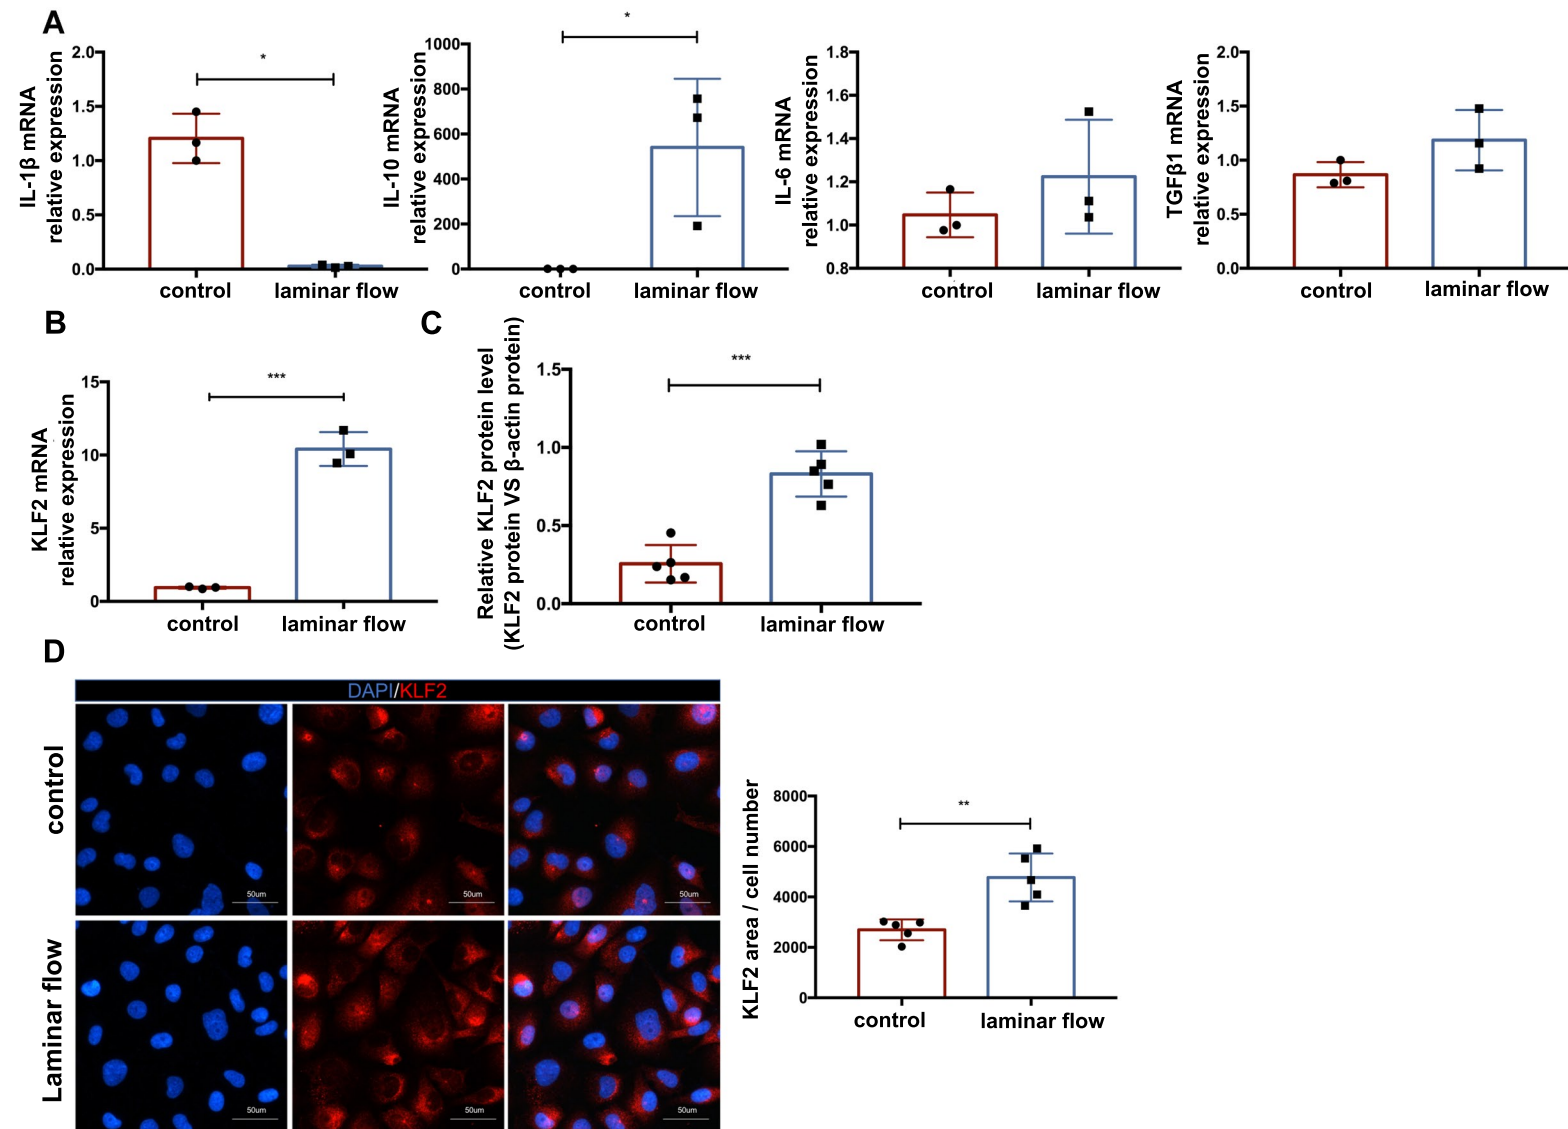

Figure S3

**A**

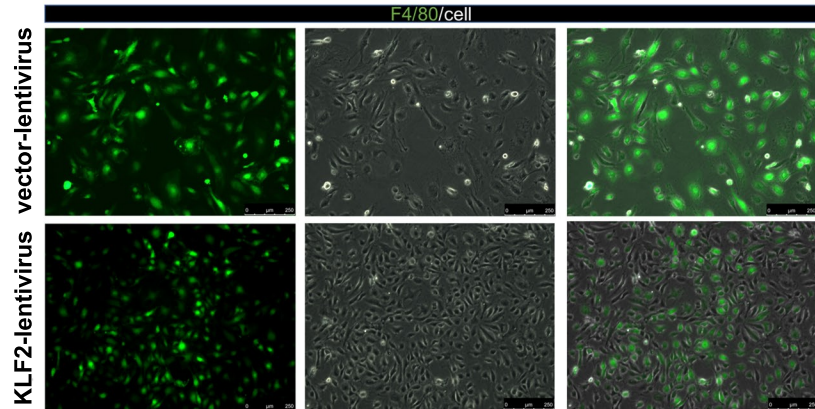

**B**

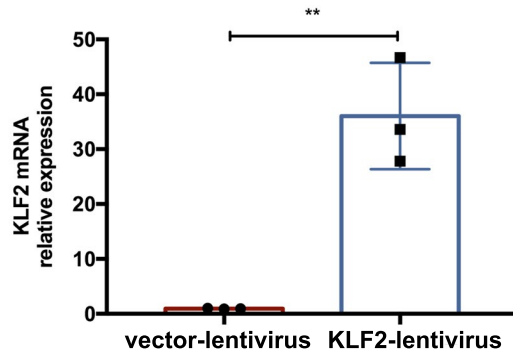

Figure S4

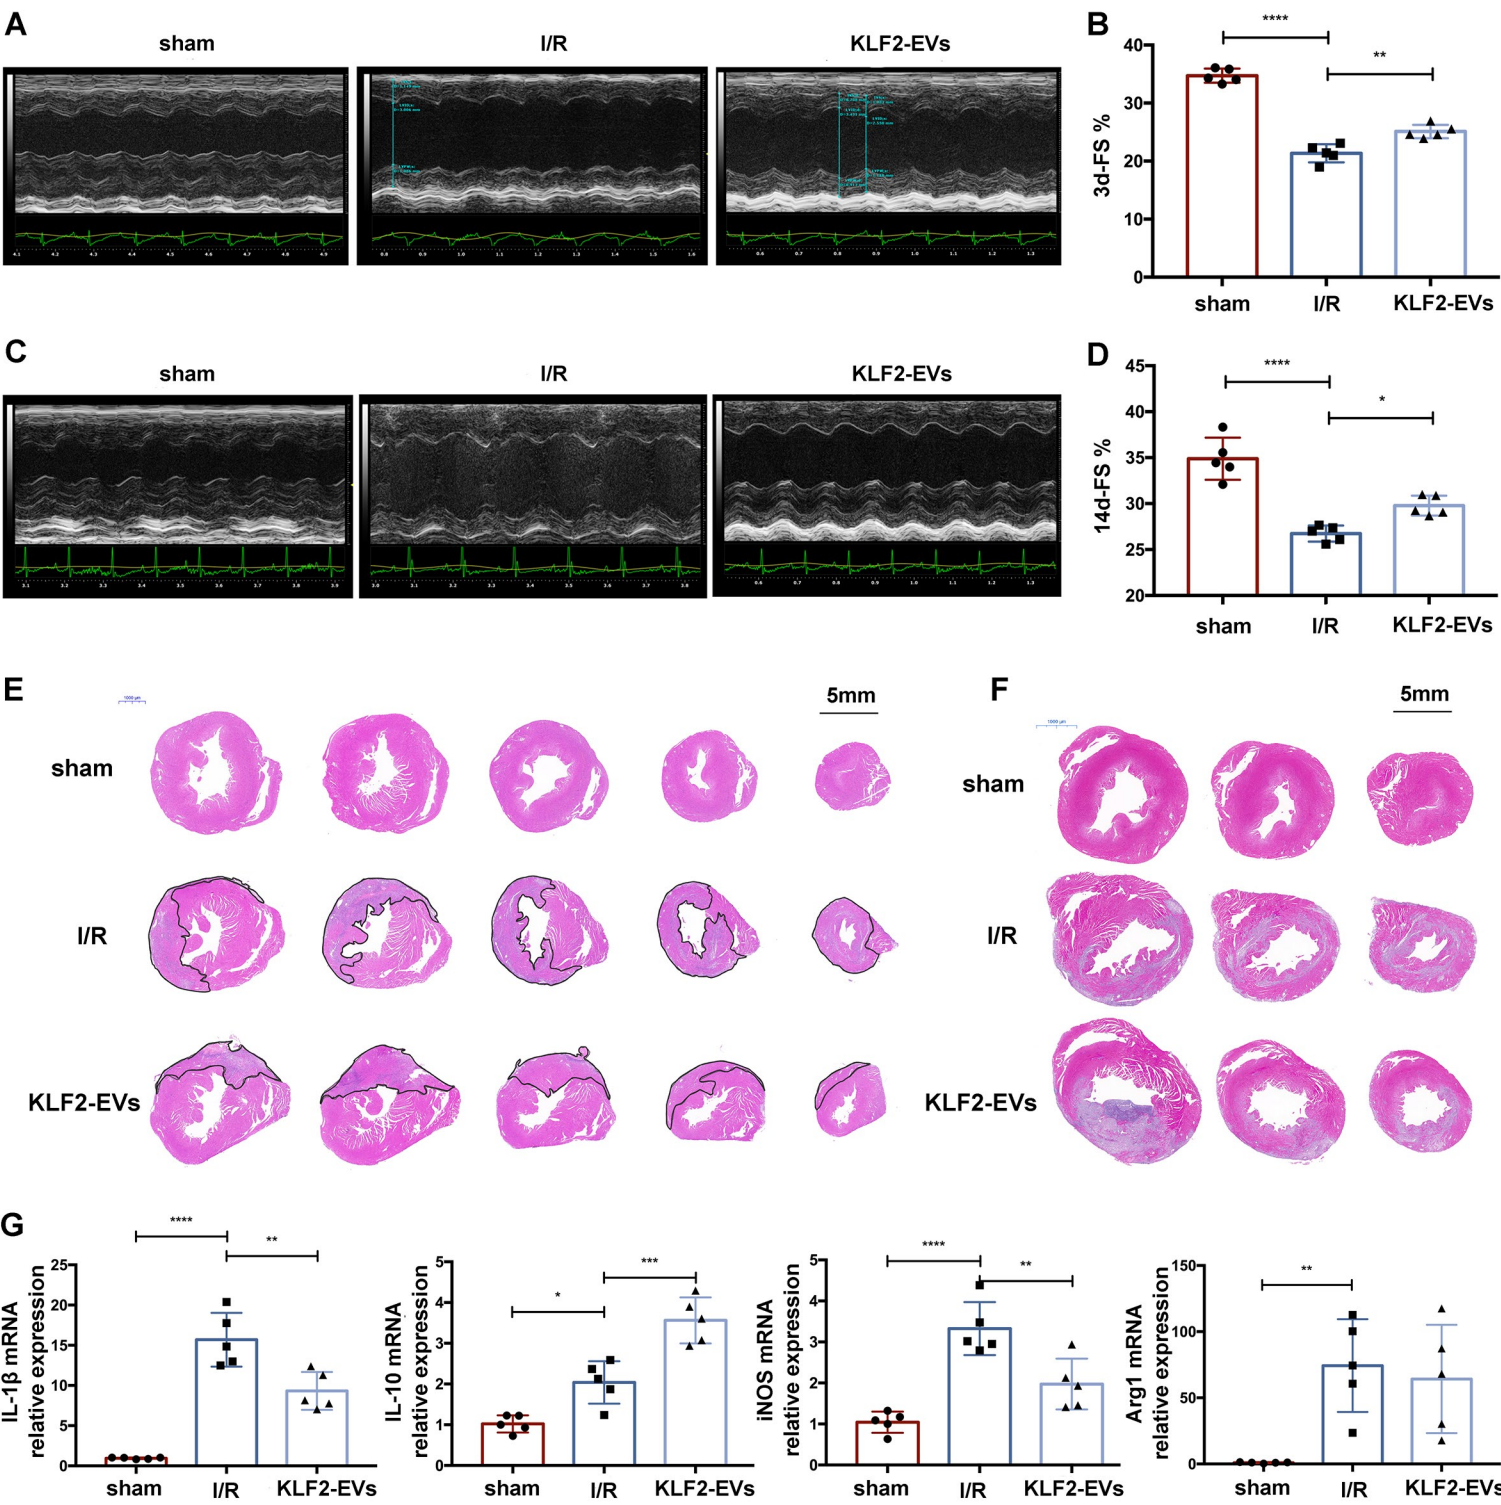

Figure S5

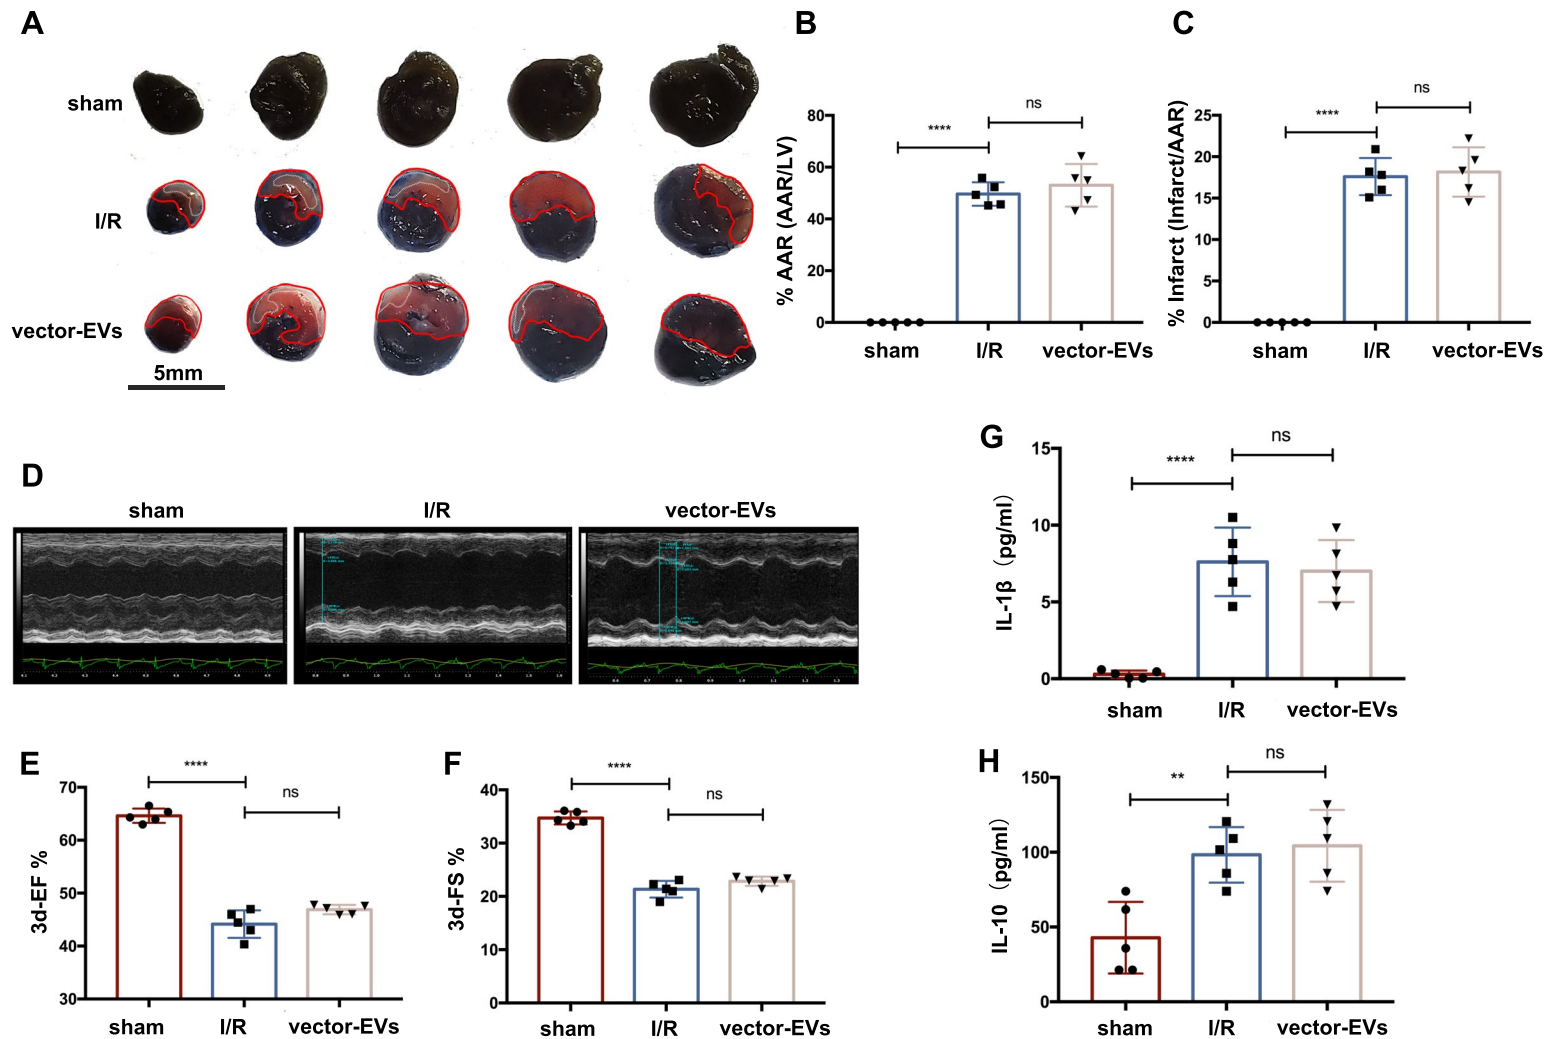

Figure S6

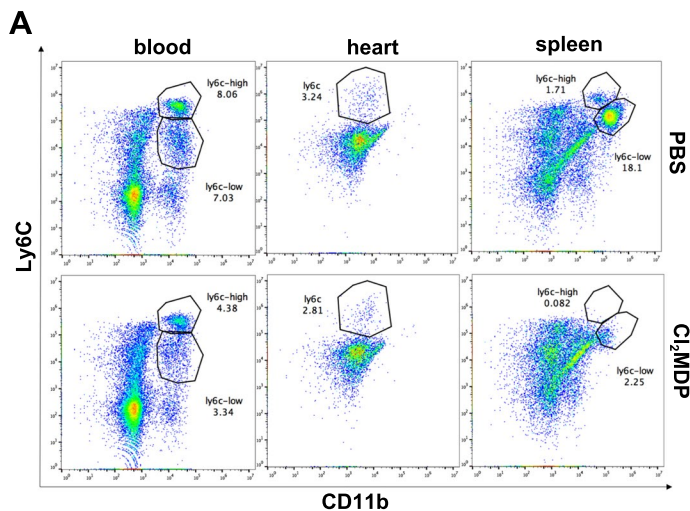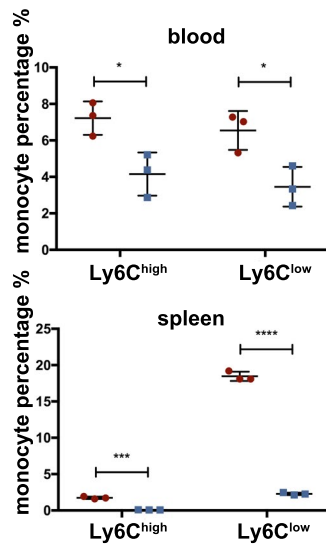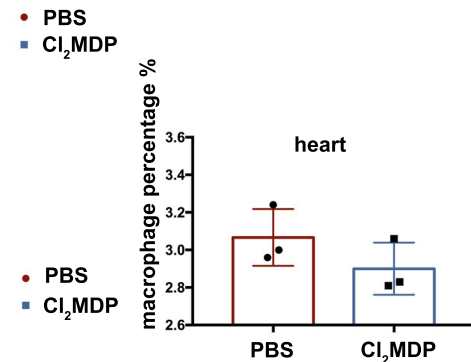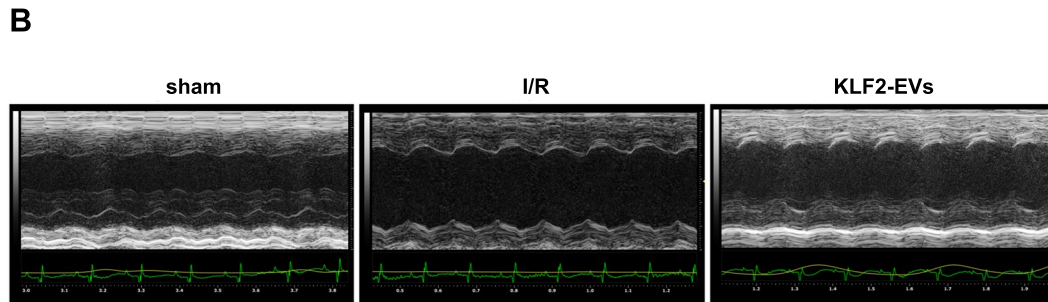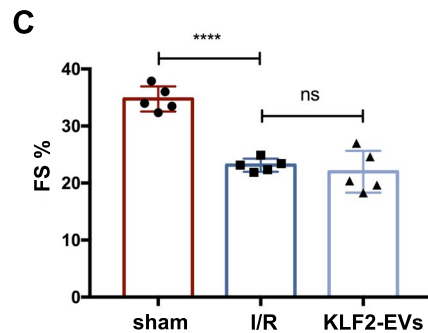

Figure S7

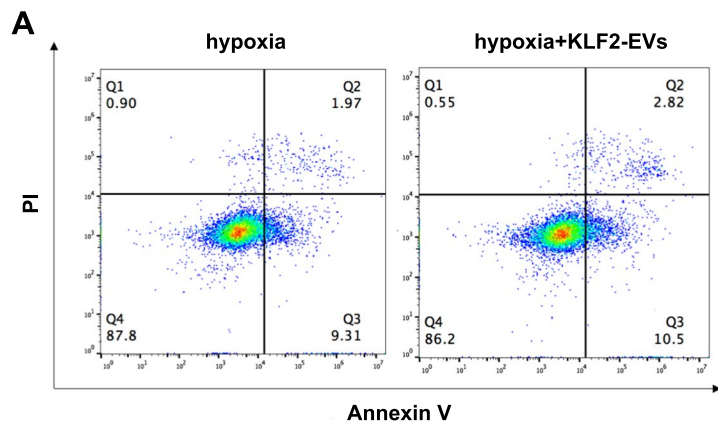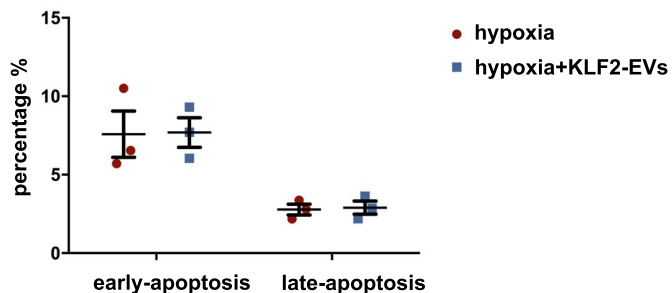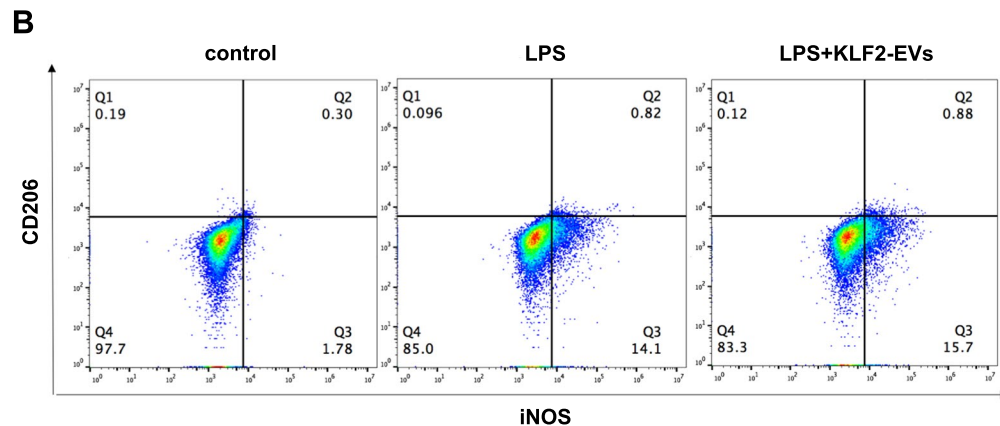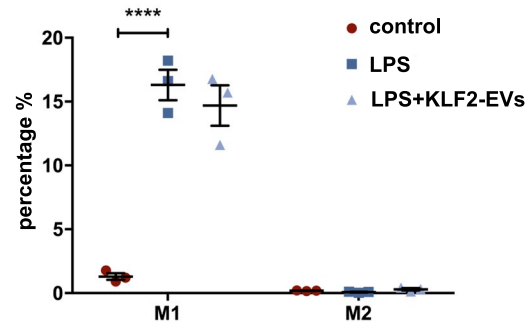

Figure S8

A

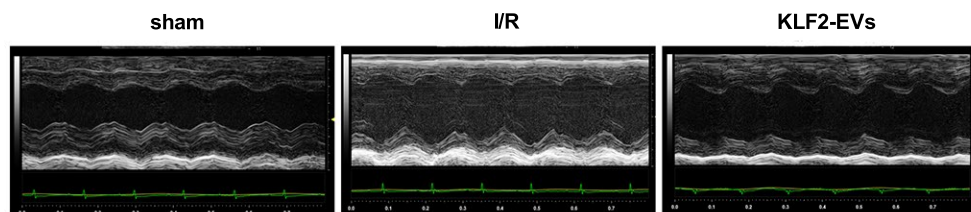

B

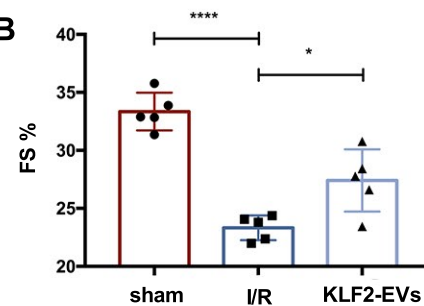

C

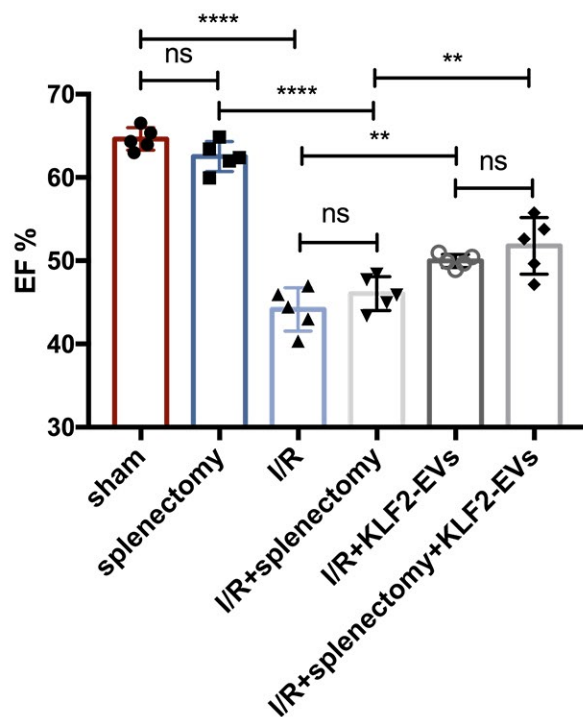

D

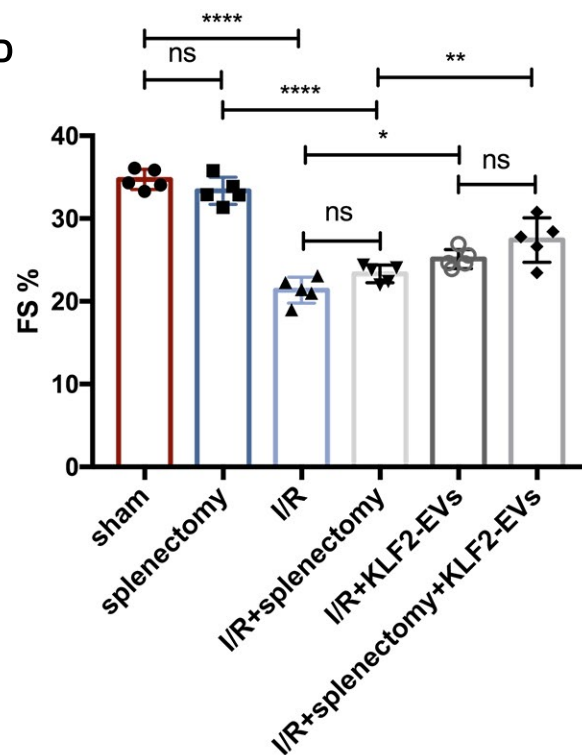

Figure S9

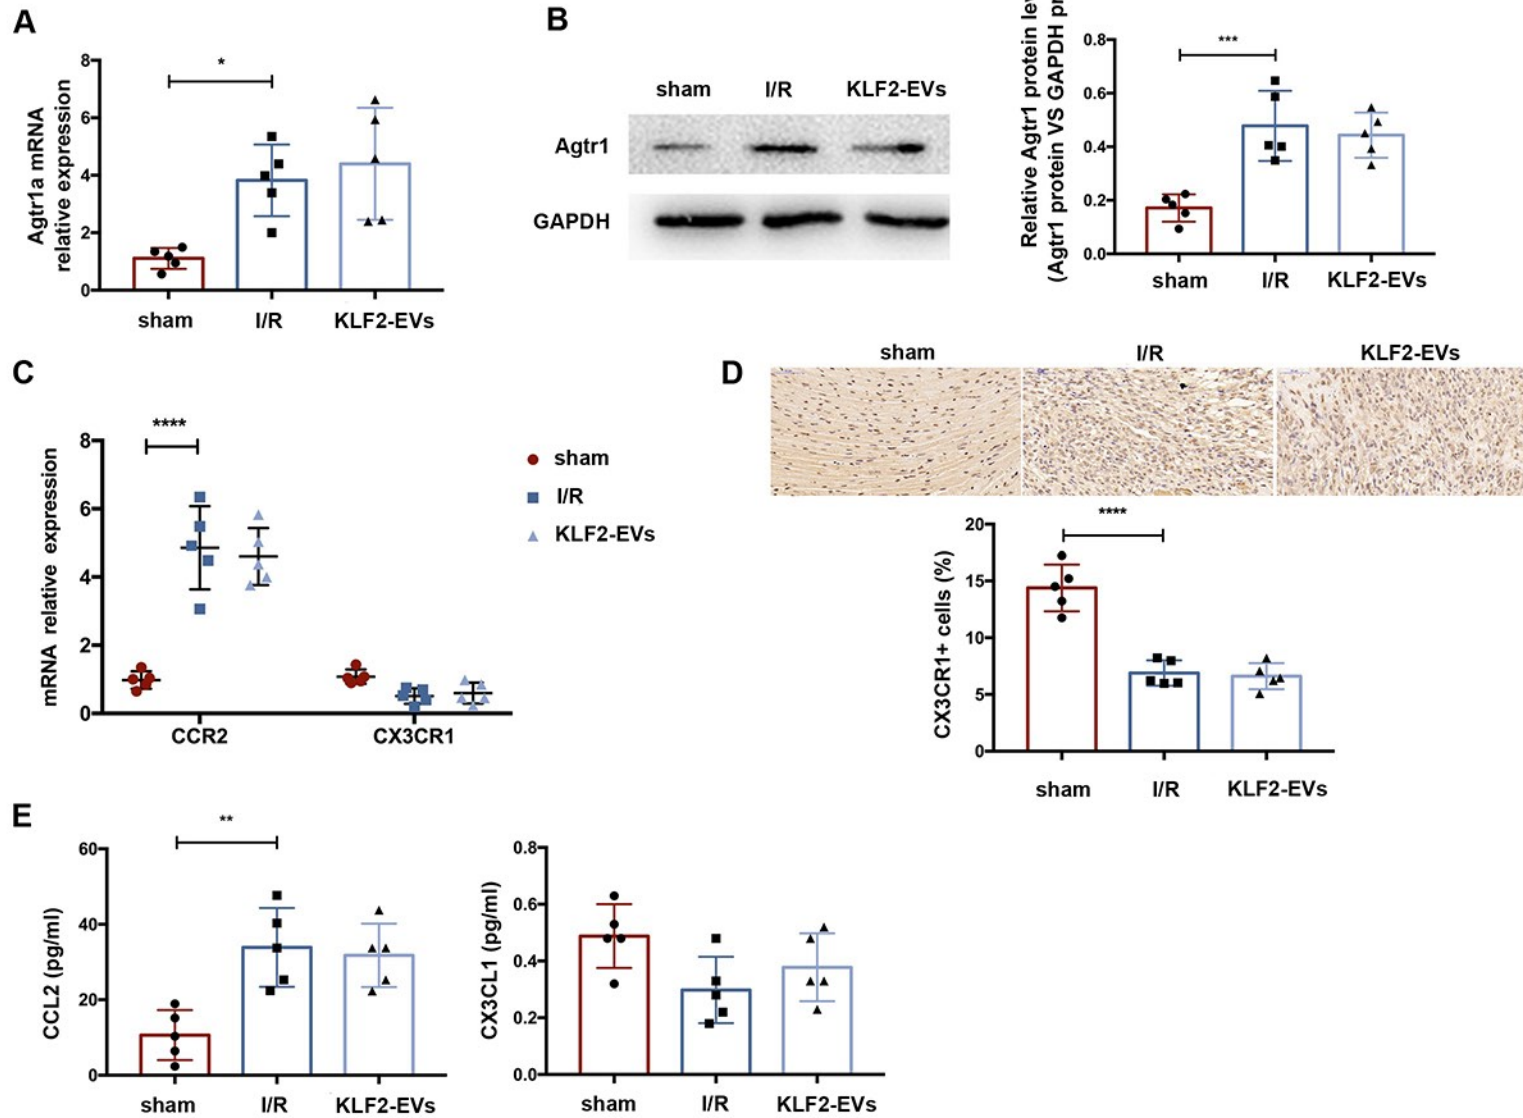

Figure S10

**A**

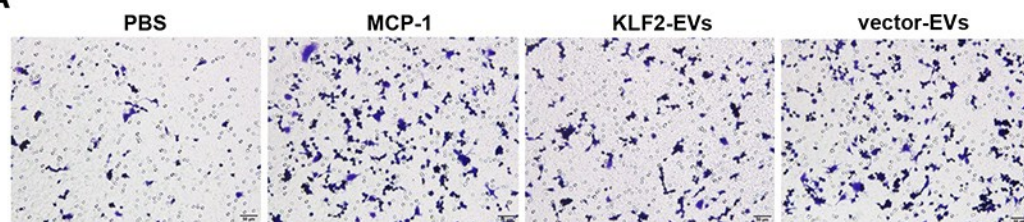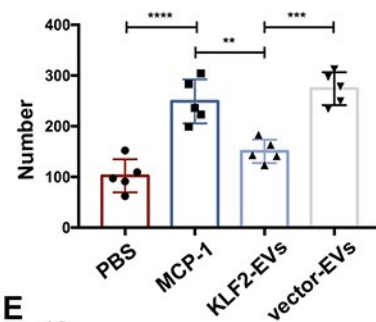

**B**

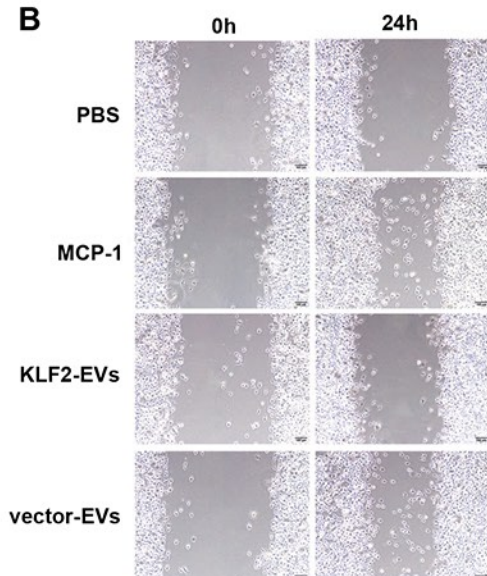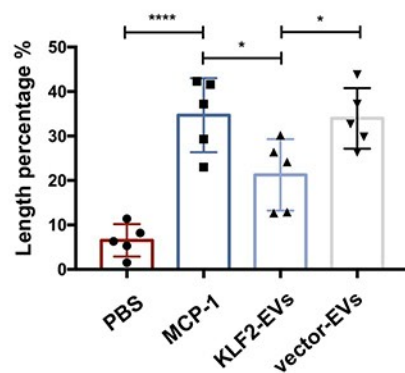

**C**

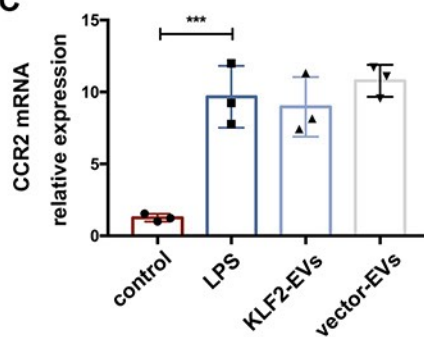

**D**

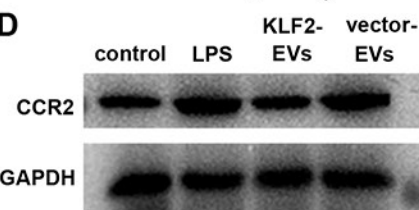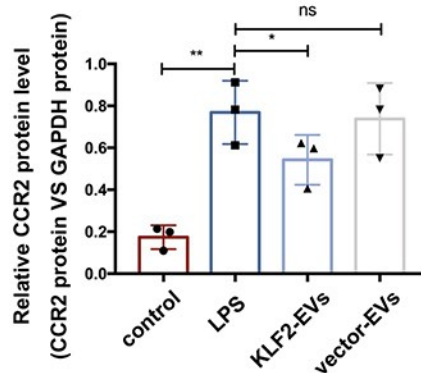

**E**

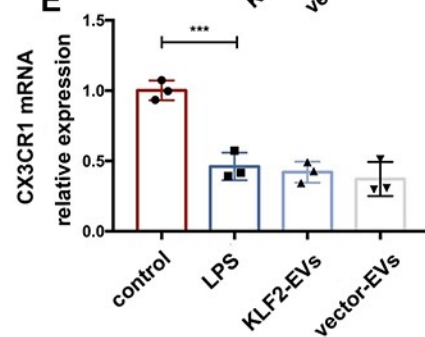

**F**

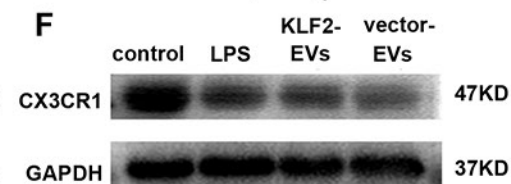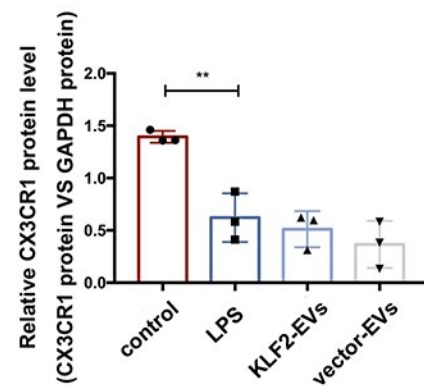

Figure S11

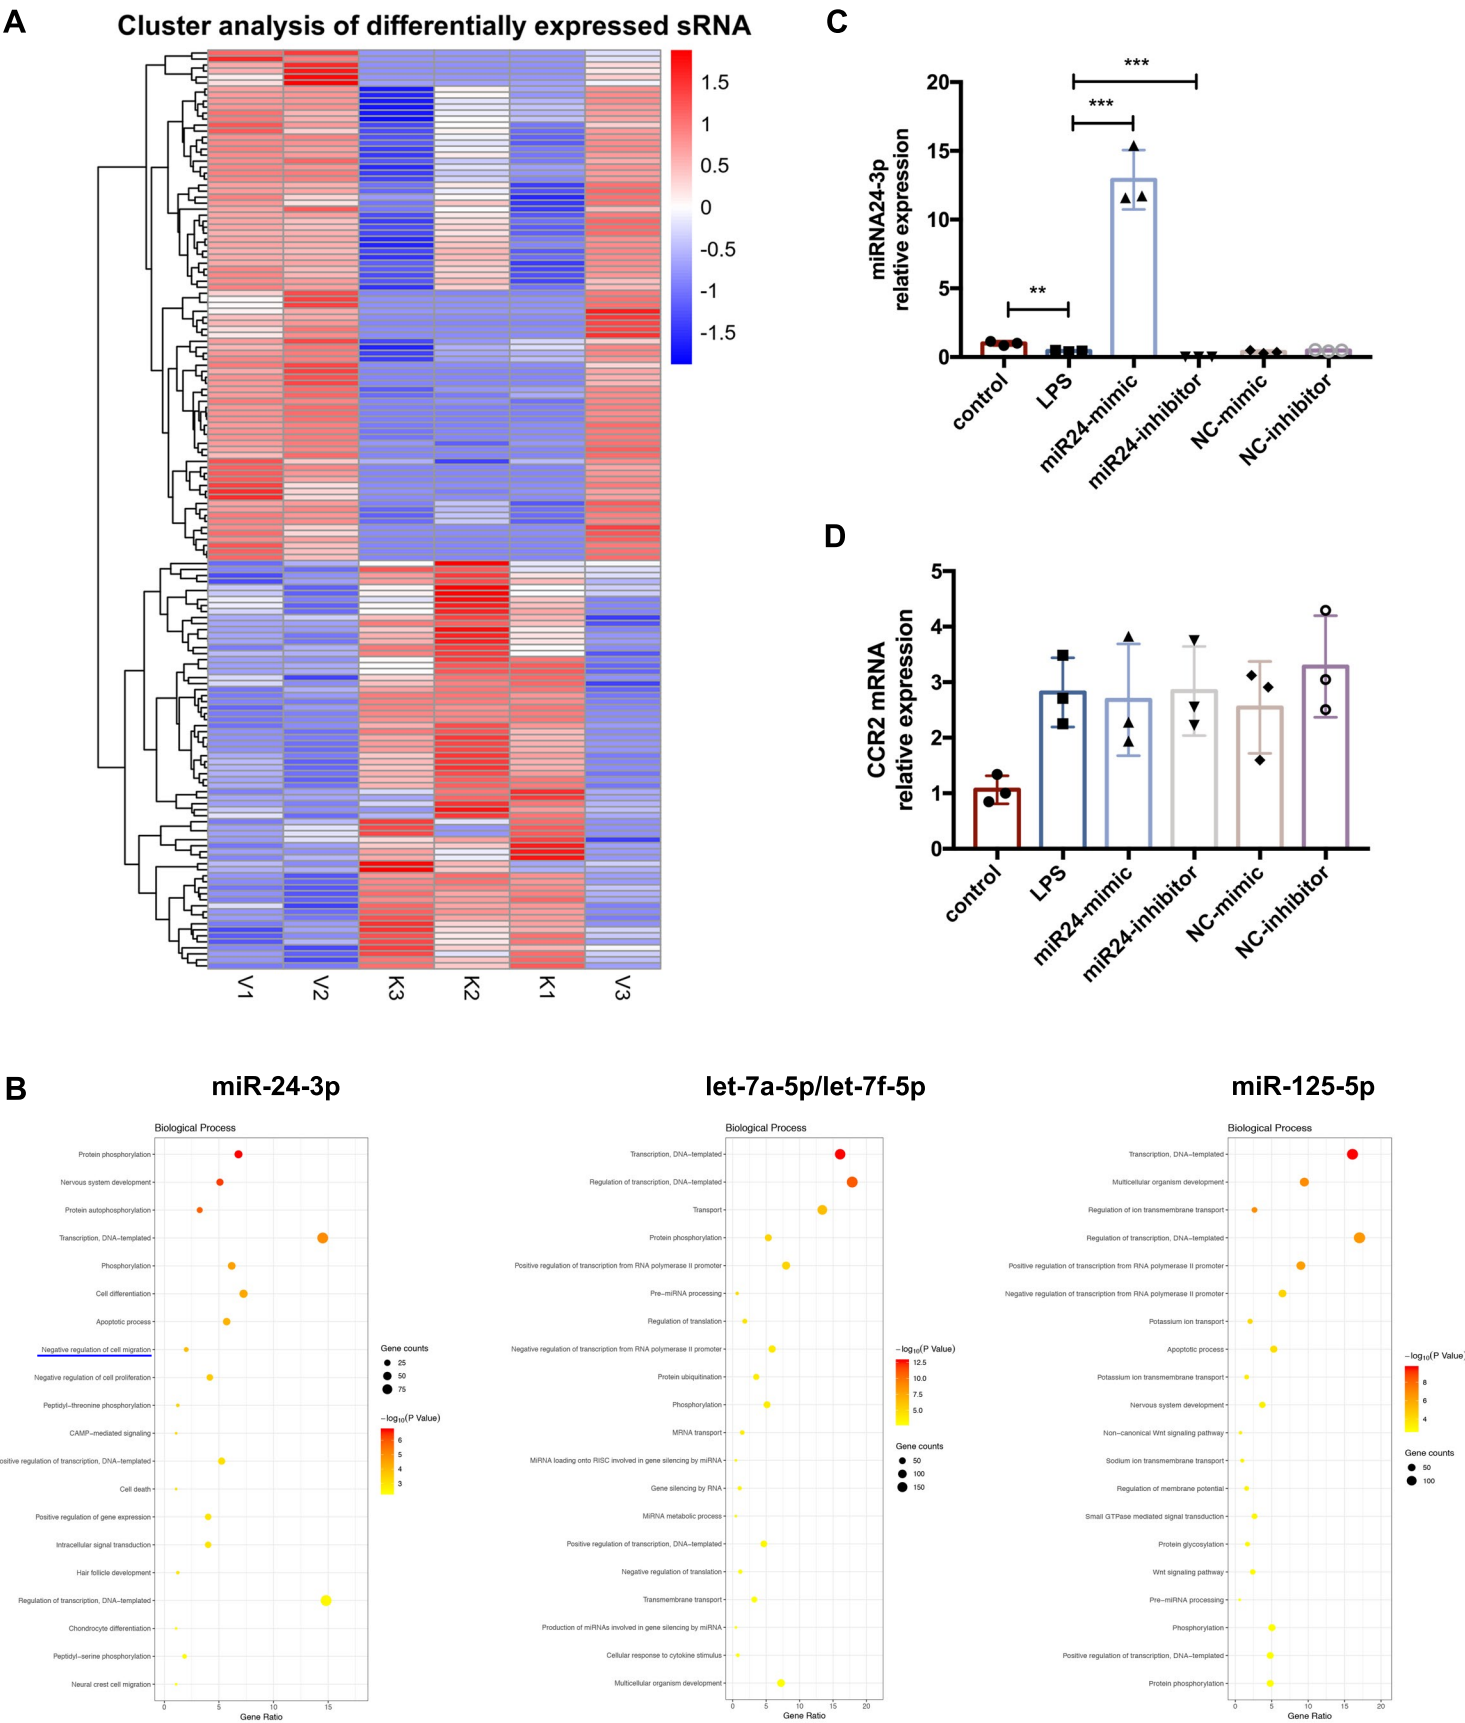

Figure S12

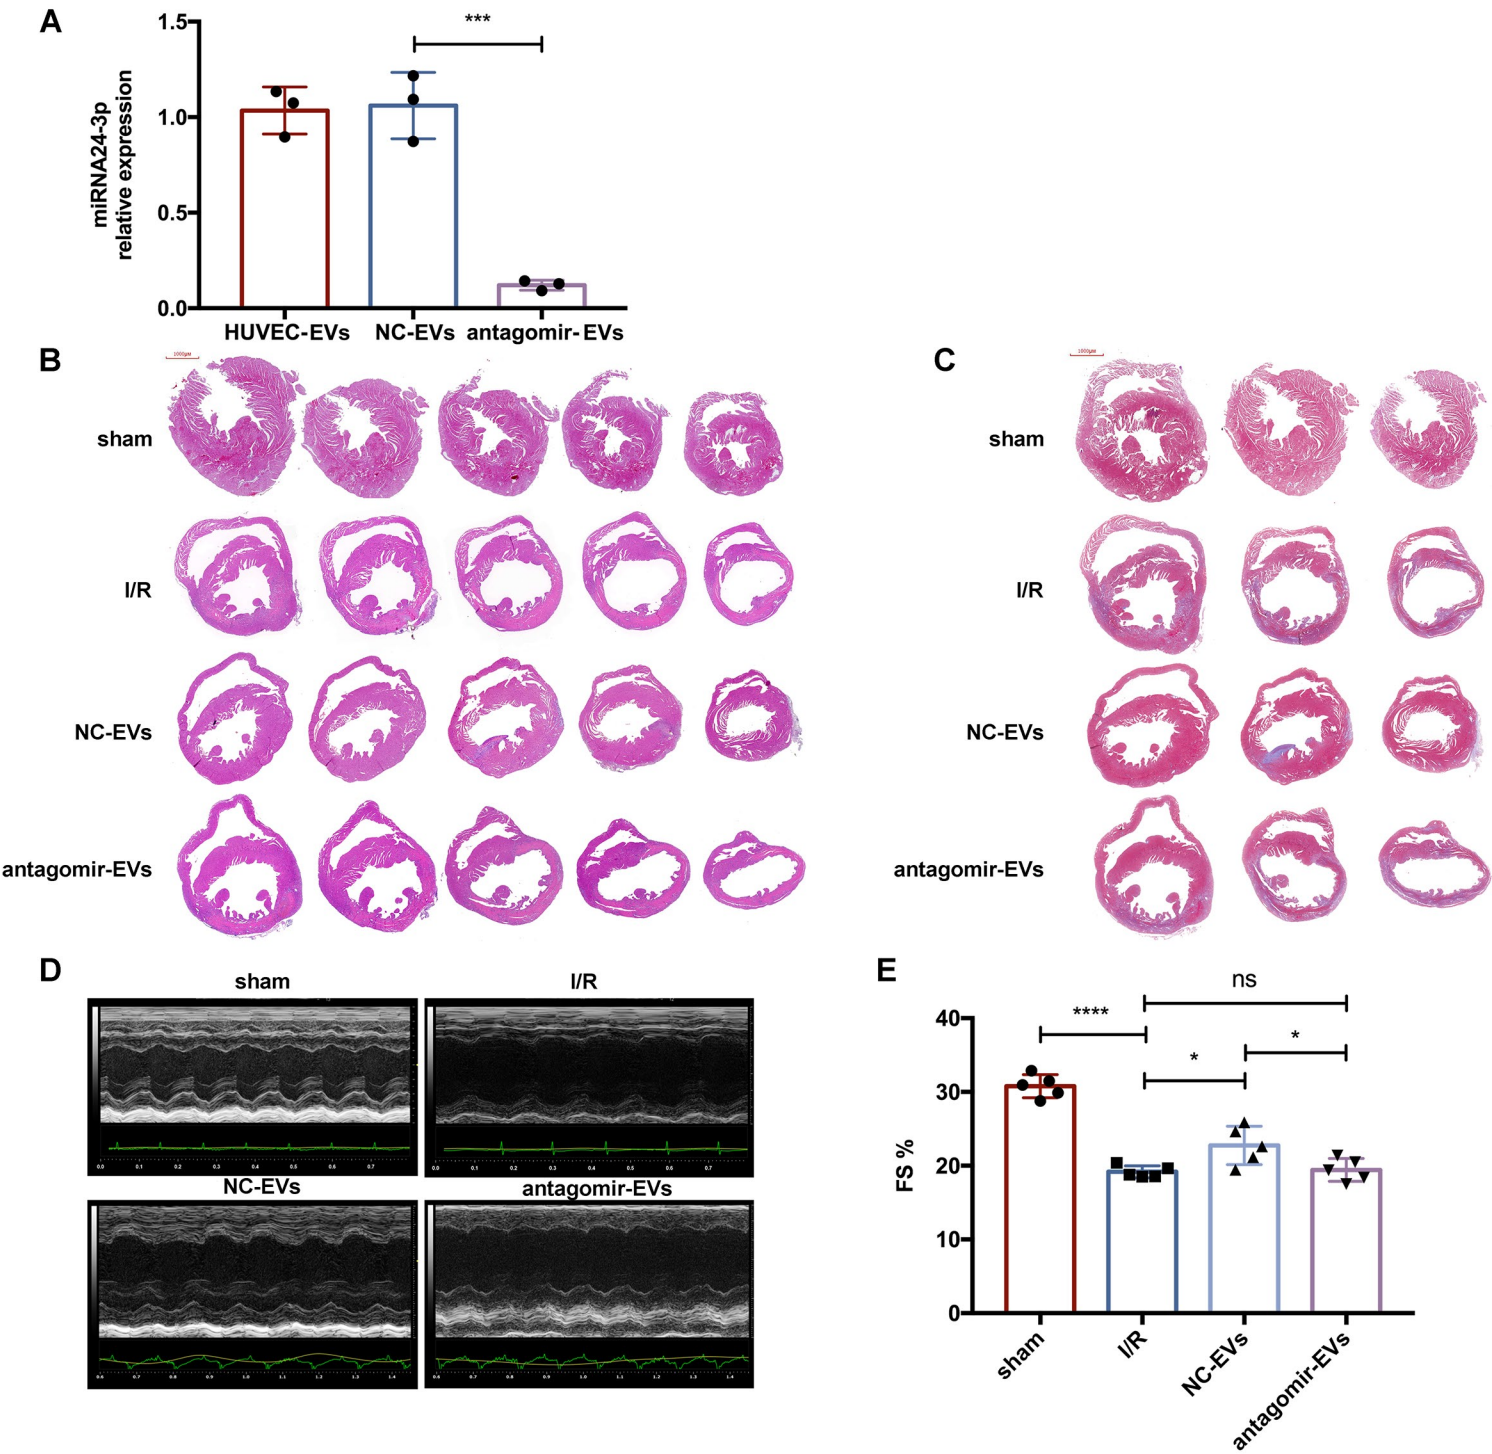

Figure S13

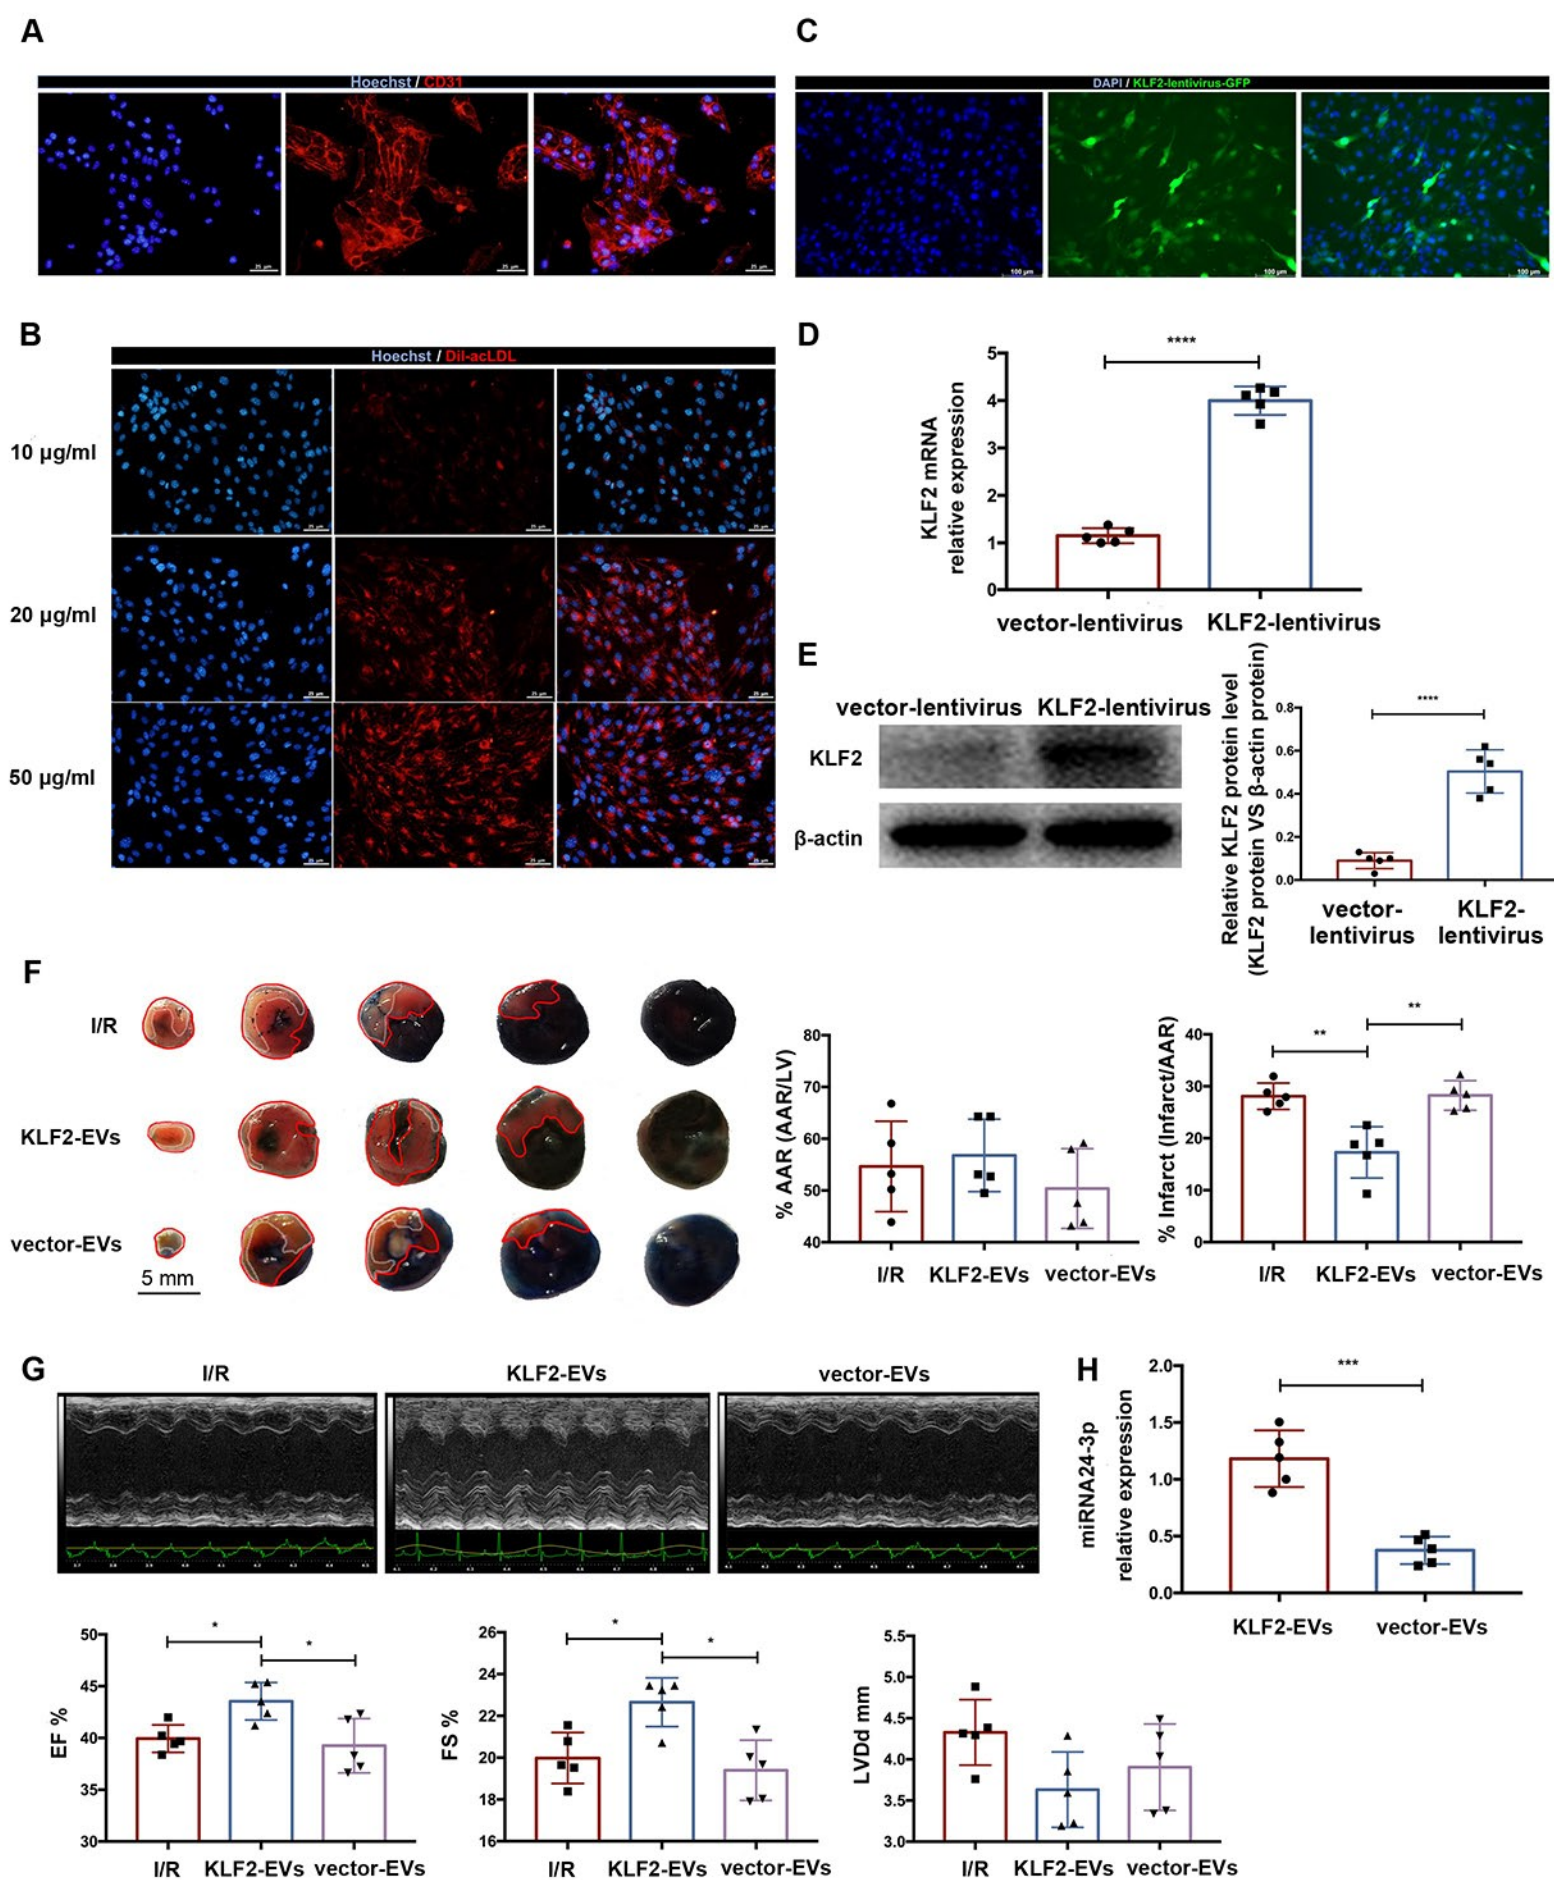

## **Supplementary Figure legend**

### **Figure S1**

The dose of extracellular vesicles (EVs) was determined according to our preliminary dose ranging experiment. Quantification of ejection fraction (EF) (A) and fractional shortening (FS) (B) in 3 days after myocardial I/R injury within sham-operated, PBS and KLF2-EVs at 1μg/g, 3μg/g or 10μg/g of body weight (n=5). Graphs depict mean ± SD. Statistical significance was measured via one-way ANOVA followed by Tukey's multiple comparisons test for multiple groups' comparison. \*P < 0.05, \*\*\*\*P < 0.0001, ns= not significant.

### **Figure S2**

HUVECs were activated into an anti-inflammatory phenotype by laminar shear stress with upregulation of KLF2. (A) Quantification of inflammatory cytokines with qRT-PCR, including IL-1β, IL-6, IL-10, TGF-β1 in control and laminar shear stress group (n=3). (B) Quantification of KLF2 mRNA with qRT-PCR in control and laminar shear stress group (n=3). (C) Quantification of WB to assess expression of KLF2 in control and laminar shear stress group (n=5). (D) Representative immunofluorescence staining of KLF2 (red) and HUVECs (DAPI blue) and quantification in control and laminar shear stress group (n=5). Scale bar=50 μm. Graphs depict mean ± SD. Statistical significance was measured via Student's t-test for two groups' comparison. \*P < 0.05, \*\*P < 0.01, \*\*\*P < 0.001.

### **Figure S3**

Transfecting HUVECs with a lentivirus vector encoding KLF2 (Lv-KLF2) remarkably increased KLF2 expression. (A) Representative fluorescence staining of KLF2 (GFP green) in KLF2-transduced HUVECs compared with empty vector-transduced HUVECs. Scale bar=250 μm. (B) Quantification of KLF2 mRNA with qRT-PCR in KLF2-transduced HUVECs compared with empty vector-transduced HUVECs (n=3). Graphs depict mean ± SD. Statistical significance was measured via Student's t-test for two groups' comparison. \*\*P < 0.01.

### **Figure S4**

Extracellular vesicles (EVs) from KLF2-transduced HUVECs ameliorated myocardial ischemia/reperfusion (I/R) injury and alleviated inflammation. (A) Representative echocardiography M-mode images and quantification of fractional shortening (FS) within sham-operated, PBS or KLF2-EVs treated mice in 3 days (A, B) and 2 weeks (C, D) following

myocardial I/R injury (n=5). (E) Representative images of H.E. staining to assess infarct area in different treatment groups. Scale bar=1000  $\mu$ m. (F) Representative images of Masson trichrome staining to assess scar area in different treatment group. Scale bar=1000  $\mu$ m. (G) Quantification of mRNA of IL-1 $\beta$ , IL-10, iNOS, Arg-1 using qRT-PCR in different treatment groups (n=5). Graphs depict mean  $\pm$  SD. Statistical significance was measured via one-way ANOVA followed by Tukey's multiple comparisons test for multiple groups' comparison. \*P < 0.05, \*\*P < 0.01, \*\*\*P < 0.001, \*\*\*\*P < 0.0001.

### Figure S5

Extracellular vesicles (EVs) derived from empty vector-transduced HUVECs could not ameliorate myocardial I/R injury and alleviated inflammation level. (A) Representative images of hearts with Evans blue/TTC staining from mice 3 days following treatment with PBS or vector-EVs. Area-at-risk (AAR): red line; infarct size (IS): white dotted line. Scale bar=5mm. Quantitative analysis of the percentage AAR (B) and percentage infarct of hearts (C) in (A) (n=5). (D) Representative echocardiography M-mode images and quantification of ejection fraction (EF) (E) and fractional shortening (FS) (F) within sham-operated, PBS or vector-EVs treated mice in 3 days after myocardial I/R injury (n=5). Concentration of cytokines IL-1 $\beta$  (G) and IL-10 (H) detected by ELISA in serum of sham-operated, PBS or vector-EVs treated mice (n=5). Graphs depict mean  $\pm$  SD. Statistical significance was measured via one-way ANOVA followed by Tukey's multiple comparisons test for multiple groups' comparison. \*\*P < 0.01, \*\*\*\*P < 0.0001, ns= not significant.

### Figure S6

Systemic depletion of monocytes/macrophages obliterated the efficacy of KLF2-EVs therapy. (A) Representative flow cytometry plots and quantification of Mo/M $\phi$  (CD11b<sup>+</sup>), Ly6C<sup>high</sup> Mo/M $\phi$  (CD11b<sup>+</sup>Ly6C<sup>high</sup>) and Ly6C<sup>low</sup> Mo/M $\phi$  (CD11b<sup>+</sup>Ly6C<sup>low</sup>) in the heart, peripheral blood and spleen from Cl<sub>2</sub>MDP and PBS treated mice (n=3). Representative echocardiography M-mode images (B) and quantification of fractional shortening (FS) (C) in sham-operated, PBS or KLF2-EVs treated mice 3 days following myocardial I/R injury and Cl<sub>2</sub>MDP treatment (n=5). Graphs depict mean  $\pm$  SD. Statistical significance was measured via Student's t-test for two groups' comparison, one-way ANOVA followed by Tukey's multiple comparisons test for multiple groups' comparison and two-way ANOVA followed by Bonferroni's multiple comparisons test

for comparison between different groups in different cell subtypes. \* $P < 0.05$ , \*\*\* $P < 0.001$ , \*\*\*\* $P < 0.0001$ , ns= not significant.

### Figure S7

KLF2-EVs did not affect the apoptosis and polarization of Ly6C<sup>high</sup> Mo/M $\phi$  in vitro. (A) Representative flow cytometry plots showing apoptosis and quantification of Annexin V+PI+ cells proportion in RAW264.7 cells with treatment of PBS or KLF2-EVs in 6 hours hypoxia followed by reoxygenation treatment (n=3). (B) Representative flow cytometry plots showing polarization and quantification of iNOS+CD206- or CD206+iNOS- cells proportion in RAW264.7 cells with treatment of PBS or KLF2-EVs in 6 hours lipopolysaccharide (100ng/ml) stimulation (n=3). Graphs depict mean  $\pm$  SD. Statistical significance was measured via Student's t-test for two groups' comparison, and two-way ANOVA followed by Bonferroni's multiple comparisons test for comparison between different groups in different cell subtypes. \*\*\*\* $P < 0.0001$ .

### Figure S8

KLF2-EVs did not inhibited Ly6C<sup>high</sup> monocytes recruitment from spleen. Representative echocardiography M-mode images (A) and quantification of fractional shortening (FS) (B) in sham-operated, PBS or KLF2-EVs treated mice 3 days after myocardial I/R injury and splenectomy (n=5). Quantification of ejection fraction (EF) (C) and fractional shortening (FS) (D) in 3 days after myocardial I/R injury in sham, splenectomy, I/R, I/R+splenectomy, I/R+KLF2-EVs and I/R+splenectomy+KLF2-EVs (n=5). Graphs depict mean  $\pm$  SD. Statistical significance was measured via one-way ANOVA followed by Tukey's multiple comparisons test for multiple groups' comparison. \* $P < 0.05$ , \*\* $P < 0.01$ , \*\*\*\* $P < 0.0001$ , ns= not significant.

### Figure S9

KLF2-EVs inhibited Ly6C<sup>high</sup> monocytes recruitment from bone marrow in vivo. (A) Quantification of mRNA of Agtr1a within spleen tissue in sham-operated, PBS or KLF2-EVs treated mice following myocardial I/R injury and splenectomy (n=5). (B) Representative images of WB and quantification to assess expression of Agtr1a within spleen tissues in sham-operated, PBS or KLF2-EVs treated mice following myocardial I/R injury and splenectomy (n=5). (C) Quantification of mRNA of CCR2 and CX3CR1 using qRT-PCR in sham-operated, PBS or KLF2-EVs treated mice following myocardial I/R injury (n=5). (D) Representative immunohistochemical staining and quantification of CX3CR1 in hearts heart in sham-operated,

PBS or KLF2-EVs treated mice following myocardial I/R injury (n=5). Scale bar=50  $\mu$ m. (E) Concentration of cytokines CCL2 and CX3CL1 detected by ELISA in sham-operated, PBS or KLF2-EVs treated mice serum following myocardial I/R injury (n=5). Graphs depict mean  $\pm$  SD. Statistical significance was measured via one-way ANOVA followed by Tukey's multiple comparisons test for multiple groups' comparison and two-way ANOVA followed by Bonferroni's multiple comparisons test for comparison between different groups in different subgroups. \*P < 0.05, \*\*P < 0.01, \*\*\*P < 0.001, \*\*\*\*P < 0.0001.

### Figure S10

KLF2-EVs restrained RAW264.7 cells migration in vitro. (A) Representative images of RAW264.7 cells in Transwell experiment with treatment of PBS, MCP-1, KLF2-EVs and vector-EVs, and quantification of number of migrated cells (n=5). Scale bar=50  $\mu$ m. (B) Representative images of RAW264.7 cells in scratch wound healing assay with treatment of PBS, MCP-1, KLF2-EVs and vector-EVs, and quantification of length percentage of cells migration (n=5). Scale bar=100  $\mu$ m. (C) Quantification of mRNA of CCR2 of RAW264.7 cells using qRT-PCR in control, LPS, KLF2-EVs and vector-EVs groups (n=3). (D) Representative images of WB and quantification to assess expression of CCR2 of RAW264.7 cells in control, LPS, KLF2-EVs and vector-EVs groups (n=3). (E) Quantification of mRNA of CX3CR1 of RAW264.7 cells using qRT-PCR in control, LPS, KLF2-EVs and vector-EVs groups (n=3). (F) Representative images of WB and quantification to assess expression of CX3CR1 of RAW264.7 cells in control, LPS, KLF2-EVs and vector-EVs groups (n=3). Graphs depict mean  $\pm$  SD. Statistical significance was measured via one-way ANOVA followed by Tukey's multiple comparisons test for multiple groups' comparison. \*P < 0.05, \*\*P < 0.01, \*\*\*P < 0.001, \*\*\*\*P < 0.0001, ns= not significant.

### Figure S11

miR-24-3p regulated KLF2-EV-mediated Ly6C<sub>high</sub> monocyte recruitment. (A) Heatmap plot of differentially expressed miRNA in KLF2-EVs and vector-EVs cluster. (B) Bubble map of pathway enrichment achieved from miRNA target genes with GO enrichment analysis for 4 miRNAs. (C) Quantification of miRNA21-3p using qRT-PCR in RAW264.7 cells treated of PBS, LPS, miR-24-3p mimic/inhibitor and NC mimic/inhibitor (n=3). (D) Quantification of CCR2 mRNA using qRT-PCR in RAW264.7 cells treated of PBS, LPS, miR-24-3p mimic/inhibitor and NC mimic/inhibitor (n=3). Graphs depict mean  $\pm$  SD. Statistical significance was measured via

Student's t-test for two groups' comparison and one-way ANOVA followed by Tukey's multiple comparisons test for multiple groups' comparison. \*\*P < 0.01, \*\*\*P < 0.001.

### Figure S12

miR-24-3p antagomir abrogated the effect of KLF2-EVs on ameliorating myocardial I/R injury.

(A) Quantification of miR-24-3p in HUVEC-EVs, NC-EVs and antagomir-EVs (n=3). (B)

Representative images of H.E. staining to assess infarct area in sham-operated, I/R+PBS, I/R+NC-EVs or I/R+antagomir-EVs treated mice 3 days after myocardial I/R injury. Scale bar=1000  $\mu$ m.

(C) Representative images of Masson trichrome staining to assess scar area in sham-operated, I/R+PBS, I/R+NC-EVs or I/R+antagomir-EVs treated mice 3 days following myocardial I/R injury. Scale bar=1000  $\mu$ m. Representative echocardiography M-mode images (D) and

quantification of fractional shortening (FS) (E) in sham-operated, I/R+PBS, I/R+NC-EVs or

I/R+antagomir-EVs treated mice 3 days after myocardial I/R injury (n=5). Graphs depict mean  $\pm$

SD. Statistical significance was measured via one-way ANOVA followed by Tukey's multiple

comparisons test for multiple groups' comparison. \*\*P < 0.01, \*\*\*P < 0.001, \*\*\*\*P < 0.0001, ns= not significant.

### Figure S13

KLF2-MCAECs-derived EVs ameliorated myocardial I/R injury and were rich in miR-24-3p. (A)

Fluorescence images show that CD31 staining in red color in MCAECs, and the nucleus was stained by Hoechst in blue color. Scale bar=25 $\mu$ m. (B) Fluorescence images show that acLDL

uptake of red color in MCAECs, and the nucleus was stained by Hoechst in blue color. Scale bar=25 $\mu$ m. (C) Representative fluorescence staining of KLF2 (GFP green) in KLF2-transduced

MCAECs compared with empty vector-transduced MCAECs. Scale bar=100 $\mu$ m. (D)

Quantification of KLF2 mRNA with qRT-PCR in KLF2-transduced MCAECs compared with

empty vector-transduced MCAECs (n=5). (E) Representative images and quantification of WB to

assess expression of KLF2 in KLF2-transduced MCAECs among with empty vector-transduced

MCAECs (n=5). (F) Representative images of hearts with Evans blue/TTC staining from mice 3

days following treatment with PBS, KLF2-EVs or vector-EVs. Area-at-risk (AAR): red line;

infarct size (IS): white dotted line. Scale bar=5mm. Quantitative analysis of the percentage of

AAR/left ventricle and percentage of infarct/AAR (n=5). (G) Representative echocardiography M-mode images and quantification of ejection fraction (EF), fractional shortening (FS) and left

ventricular end-diastolic diameter (LVDd) within PBS, KLF2-EVs or vector-EVs treated mice in 3 days following myocardial I/R injury (n=5). (H) Quantification of miR-24-3p in KLF2-EVs compared to vector-EVs derived from MCAECs (n=5). Graphs depict mean  $\pm$  SD. Statistical significance was measured via Student's t-test for two groups' comparison and one-way ANOVA followed by Tukey's multiple comparisons test for multiple groups' comparison. \*P < 0.05, \*\*P < 0.01, \*\*\*P < 0.001, \*\*\*\*P < 0.0001.

| <b>Table S1. Nanoparticle tracking analysis of extracellular vesicles (EVs)</b> |                   |                      |                      |                      |
|---------------------------------------------------------------------------------|-------------------|----------------------|----------------------|----------------------|
|                                                                                 | laminar-EVs       | WT-EVs               | KLF2-EVs             | vector-EVs           |
| Sample Name                                                                     | A186-01-01        | A186-01-02           | A186-02              | A186-03              |
| Volume (ul)                                                                     | 200               | 200                  | 200                  | 200                  |
| Median Diameter (nm)                                                            | 97.1              | 95.1                 | 90.8                 | 98.9                 |
| Diameter Peak (nm)                                                              | 81.4              | 80.3                 | 78.6                 | 86.2                 |
| Percentage (%)                                                                  | 97.4              | 97.5                 | 99                   | 98.5                 |
| Concentration (Particles / mL)                                                  | $7.0 \times 10^9$ | $2.7 \times 10^{10}$ | $3.8 \times 10^{10}$ | $5.2 \times 10^{10}$ |

| Table S2. Echocardiography of I/R mice-1 |            |             |            |            |             |            |
|------------------------------------------|------------|-------------|------------|------------|-------------|------------|
|                                          | 3d         |             |            | 14d        |             |            |
|                                          | sham       | I/R         | KLF2-EVs   | sham       | I/R         | KLF2-EVs   |
| IVS;d                                    | 0.71±0.01  | 0.78±0.04   | 0.77±0.03  | 0.83±0.08  | 0.72±0.06   | 0.72±0.04  |
| IVS;s                                    | 1.16±0.03  | 1.04±0.08   | 1.11±0.05  | 1.31±0.17  | 1.02±0.07   | 1.07±0.07  |
| LVID;d                                   | 3.57±0.06  | 3.33±0.13   | 3.65±0.21  | 3.24±0.19  | 3.96±0.18   | 3.54±0.12  |
| LVID;s                                   | 2.35±0.08  | 2.59±0.10   | 2.78±0.14  | 2.15±0.15  | 2.69±0.21   | 2.46±0.09  |
| LVPW;d                                   | 0.71±0.01  | 0.76±0.03   | 0.85±0.09  | 0.79±0.05  | 0.72±0.07   | 0.75±0.03  |
| LVPW;s                                   | 1.21±0.08  | 1.05±0.05   | 1.05±0.06  | 1.34±0.16  | 1.12±0.12   | 1.15±0.07  |
| EF                                       | 64.63±1.35 | 44.15±2.60  | 49.98±0.78 | 67.60±2.42 | 53.06±1.16  | 56.79±0.96 |
| FS                                       | 34.73±1.21 | 21.35±1.55  | 25.10±1.16 | 34.88±2.29 | 26.74±0.87  | 29.78±1.08 |
| LV Mass                                  | 80.44±2.15 | 832.74±6.41 | 99.82±7.80 | 83.94±6.60 | 90.13±10.11 | 83.31±9.53 |
| LV Mass (Corrected)                      | 63.98±2.79 | 67.77±5.18  | 80.37±5.90 | 68.23±5.03 | 72.17±8.25  | 66.29±7.60 |
| LV Vol;d                                 | 53.14±1.90 | 46.86±4.01  | 56.46±8.12 | 45.26±4.70 | 60.67±11.21 | 50.24±4.96 |
| LV Vol;s                                 | 17.62±2.10 | 26.13±1.25  | 27.91±3.50 | 15.09±2.12 | 23.65±3.79  | 21.00±2.36 |

IVS;d: end-diastolic interventricular septal thickness; IVS;s: end-systolic interventricular septal thickness; LVID;d: left ventricular end-diastolic diameter; LVID;s: left ventricular end-systolic diameter; LVPW;d: end-diastolic left ventricular posterior wall thickness; LVPW;s: end-systolic left ventricular posterior wall thickness; EF: left ventricular ejection fraction; FS: left ventricular fractional shortening; LV Vol;d: end-diastolic left ventricular volume; LV Vol;s =end-systolic left ventricular volume.

| <b>Table S3. Echocardiography of I/R mice-2</b> |            |             |            |
|-------------------------------------------------|------------|-------------|------------|
|                                                 | sham       | I/R         | vector-EVs |
| IVS;d                                           | 0.71±0.01  | 0.78±0.04   | 0.74±0.05  |
| IVS;s                                           | 1.16±0.03  | 1.04±0.08   | 1.07±0.04  |
| LVID;d                                          | 3.57±0.06  | 3.33±0.13   | 3.65±0.21  |
| LVID;s                                          | 2.35±0.08  | 2.59±0.10   | 2.91±0.23  |
| LVPW;d                                          | 0.71±0.01  | 0.76±0.03   | 0.80±0.04  |
| LVPW;s                                          | 1.21±0.08  | 1.05±0.05   | 1.03±0.09  |
| EF                                              | 64.63±1.35 | 44.15±2.60  | 46.89±0.88 |
| FS                                              | 34.73±1.21 | 21.35±1.55  | 22.84±0.87 |
| LV Mass                                         | 80.44±2.15 | 832.74±6.41 | 98.74±8.98 |
| LV Mass (Corrected)                             | 63.98±2.79 | 67.77±5.18  | 78.06±6.67 |
| LV Vol;d                                        | 53.14±1.90 | 46.86±4.01  | 56.58±8.19 |
| LV Vol;s                                        | 17.62±2.10 | 26.13±1.25  | 30.00±3.85 |

IVS;d: end-diastolic interventricular septal thickness; IVS;s: end-systolic interventricular septal thickness; LVID;d: left ventricular end-diastolic diameter; LVID;s: left ventricular end-systolic diameter; LVPW;d: end-diastolic left ventricular posterior wall thickness; LVPW;s: end-systolic left ventricular posterior wall thickness; EF: left ventricular ejection fraction; FS: left ventricular fractional shortening; LV Vol;d: end-diastolic left ventricular volume; LV Vol;s =end-systolic left ventricular volume.

| <b>Table S4. Echocardiography of I/R+Cl<sub>2</sub>MDP mice</b> |            |              |            |
|-----------------------------------------------------------------|------------|--------------|------------|
|                                                                 | sham       | I/R          | KLF2-EVs   |
| IVS;d                                                           | 0.74±0.08  | 0.81±0.04    | 0.73±0.05  |
| IVS;s                                                           | 1.10±0.07  | 1.25±0.10    | 1.13±0.16  |
| LVID;d                                                          | 3.79±0.17  | 3.90±0.22    | 3.75±0.33  |
| LVID;s                                                          | 2.50±0.17  | 3.05±0.23    | 2.81±0.22  |
| LVPW;d                                                          | 0.74±0.06  | 1.12±0.23    | 0.68±0.09  |
| LVPW;s                                                          | 1.25±0.12  | 1.22±0.12    | 0.87±0.16  |
| EF                                                              | 63.95±2.17 | 44.87±1.55   | 45.95±3.80 |
| FS                                                              | 34.75±2.20 | 23.13±1.16   | 21.98±3.66 |
| LV Mass                                                         | 93.91±5.96 | 124.90±15.68 | 80.06±4.93 |
| LV Mass (Corrected)                                             | 76.86±5.37 | 96.39±14.08  | 64.72±1.55 |
| LV Vol;d                                                        | 64.19±4.62 | 66.68±5.64   | 52.81±5.39 |
| LV Vol;s                                                        | 24.68±3.42 | 38.78±1.58   | 30.03±5.83 |

IVS;d: end-diastolic interventricular septal thickness; IVS;s: end-systolic interventricular septal thickness; LVID;d: left ventricular end-diastolic diameter; LVID;s: left ventricular end-systolic diameter; LVPW;d: end-diastolic left ventricular posterior wall thickness; LVPW;s: end-systolic left ventricular posterior wall thickness; EF: left ventricular ejection fraction; FS: left ventricular fractional shortening; LV Vol;d: end-diastolic left ventricular volume; LV Vol;s =end-systolic left ventricular volume.

| Table S5. Echocardiography of I/R+splenectomy mice |            |            |              |
|----------------------------------------------------|------------|------------|--------------|
|                                                    | sham       | I/R        | KLF2-EVs     |
| IVS;d                                              | 0.67±0.03  | 0.63±0.07  | 0.72±0.05    |
| IVS;s                                              | 1.13±0.10  | 0.91±0.06  | 1.06±0.07    |
| LVID;d                                             | 3.86±0.05  | 4.14±0.24  | 4.03±0.28    |
| LVID;s                                             | 2.61±0.06  | 3.27±0.16  | 2.97±0.32    |
| LVPW;d                                             | 0.67±0.05  | 0.67±0.03  | 0.78±0.04    |
| LVPW;s                                             | 1.07±0.08  | 0.98±0.01  | 1.15±0.15    |
| EF                                                 | 62.51±1.80 | 46.06±2.03 | 51.79±3.40   |
| FS                                                 | 33.35±1.63 | 23.32±1.07 | 27.41±2.69   |
| LV Mass                                            | 87.94±3.67 | 92.40±4.42 | 102.88±14.71 |
| LV Mass (Corrected)                                | 70.53±2.56 | 73.54±3.80 | 83.08±11.47  |
| LV Vol;d                                           | 64.23±2.35 | 79.05±7.12 | 74.09±11.55  |
| LV Vol;s                                           | 24.56±0.59 | 41.95±3.97 | 36.58±8.02   |

IVS;d: end-diastolic interventricular septal thickness; IVS;s: end-systolic interventricular septal thickness; LVID;d: left ventricular end-diastolic diameter; LVID;s: left ventricular end-systolic diameter; LVPW;d: end-diastolic left ventricular posterior wall thickness; LVPW;s: end-systolic left ventricular posterior wall thickness; EF: left ventricular ejection fraction; FS: left ventricular fractional shortening; LV Vol;d: end-diastolic left ventricular volume; LV Vol;s =end-systolic left ventricular volume.

**Table S6. miRNA array analysis in KLF2-EVs and vector-EVs**

| sRNA              | KLF2 EVs readcount | vec EVs readcount | log2FoldChange | pval       | padj       |
|-------------------|--------------------|-------------------|----------------|------------|------------|
| hsa-miR-518b      | 80.95709263        | 0                 | 9.1348         | 0.00031263 | 0.0033987  |
| hsa-miR-519d-3p   | 52.88340286        | 0                 | 8.5204         | 0.0010403  | 0.009425   |
| hsa-miR-6727-5p   | 72.67122968        | 1.296713245       | 5.9137         | 0.00012425 | 0.0014774  |
| hsa-miR-150-5p    | 153.1353324        | 5.681829032       | 4.7631         | 0.0026838  | 0.019829   |
| hsa-miR-92a-1-5p  | 967.3590434        | 59.0541502        | 4.0335         | 5.68E-23   | 8.65E-21   |
| hsa-miR-223-3p    | 110.2942226        | 9.124587196       | 3.6096         | 0.00090707 | 0.0084181  |
| hsa-miR-365b-5p   | 4160.032334        | 359.8232112       | 3.5324         | 1.87E-19   | 1.42E-17   |
| hsa-miR-365a-5p   | 5849.715315        | 506.6019167       | 3.5295         | 4.10E-09   | 1.11E-07   |
| hsa-miR-184       | 557.4517819        | 69.2383072        | 3.0087         | 3.75E-05   | 0.000529   |
| hsa-miR-340-3p    | 240.1936392        | 33.84088965       | 2.8324         | 1.06E-06   | 2.08E-05   |
| hsa-miR-125a-5p   | 5556.897318        | 784.7020719       | 2.8244         | 4.33E-19   | 2.99E-17   |
| hsa-miR-30c-1-3p  | 202.7304376        | 31.48959463       | 2.6889         | 3.56E-08   | 8.20E-07   |
| hsa-miR-30c-2-3p  | 776.351279         | 133.635185        | 2.5388         | 9.27E-16   | 5.43E-14   |
| hsa-miR-671-5p    | 146.2630296        | 25.28622527       | 2.5268         | 0.0006096  | 0.006104   |
| hsa-miR-130b-5p   | 1223.022147        | 212.5728201       | 2.5242         | 4.74E-07   | 9.75E-06   |
| hsa-miR-24-3p     | 10578.72169        | 1921.136663       | 2.4611         | 7.47E-06   | 0.0001184  |
| hsa-let-7a-5p     | 106337.7701        | 19852.97182       | 2.4212         | 3.94E-29   | 3.00E-26   |
| hsa-miR-139-3p    | 1609.632639        | 310.2795723       | 2.3765         | 2.11E-20   | 2.25E-18   |
| hsa-miR-9-5p      | 1154.798936        | 229.3359774       | 2.3316         | 1.48E-09   | 4.49E-08   |
| hsa-let-7f-5p     | 45027.84826        | 9777.767102       | 2.2032         | 1.18E-25   | 3.00E-23   |
| hsa-miR-125b-5p   | 11095.05492        | 2473.303988       | 2.1655         | 6.86E-12   | 2.90E-10   |
| hsa-let-7d-3p     | 5594.509328        | 1253.568918       | 2.158          | 5.29E-17   | 3.36E-15   |
| hsa-miR-1-3p      | 2239.233171        | 537.780417        | 2.057          | 1.12E-13   | 5.32E-12   |
| hsa-miR-451a      | 3199.408495        | 805.136868        | 1.9907         | 0.0001182  | 0.001395   |
| hsa-miR-10a-5p    | 115230.0574        | 29243.22848       | 1.9783         | 5.16E-21   | 6.54E-19   |
| hsa-miR-1180-3p   | 47578.44509        | 12122.6495        | 1.9726         | 4.74E-24   | 9.02E-22   |
| hsa-miR-139-5p    | 2338.883667        | 618.567675        | 1.9195         | 7.27E-14   | 3.80E-12   |
| hsa-miR-411-3p    | 131.3441134        | 37.30382501       | 1.8106         | 0.0031701  | 0.021479   |
| hsa-miR-486-3p    | 7165.011169        | 2073.508261       | 1.7891         | 2.37E-20   | 2.25E-18   |
| hsa-miR-486-5p    | 7195.656484        | 2084.338877       | 1.7878         | 6.38E-20   | 5.40E-18   |
| hsa-miR-145-3p    | 281.5260036        | 83.10638487       | 1.7613         | 0.0019271  | 0.014965   |
| hsa-let-7e-5p     | 11570.90572        | 3500.307626       | 1.7249         | 1.33E-10   | 4.59E-09   |
| hsa-miR-206       | 2885.252003        | 901.4361224       | 1.6784         | 8.29E-05   | 0.0010875  |
| hsa-miR-505-3p    | 605.5271149        | 194.8521392       | 1.6376         | 6.41E-06   | 0.00010603 |
| hsa-miR-208b-3p   | 399.0121092        | 132.3047424       | 1.59           | 0.0017136  | 0.014022   |
| hsa-miR-92b-5p    | 401.5562671        | 140.8118773       | 1.5113         | 0.0018873  | 0.014815   |
| hsa-miR-3184-5p   | 23324.66229        | 8616.595143       | 1.4367         | 5.84E-09   | 1.48E-07   |
| hsa-miR-423-3p    | 23309.93772        | 8612.632029       | 1.4365         | 5.71E-09   | 1.48E-07   |
| hsa-miR-125b-1-3p | 827.1158035        | 317.6923949       | 1.3811         | 0.0002855  | 0.0031951  |
| hsa-miR-1293      | 638.2774422        | 252.3701947       | 1.3387         | 0.0070939  | 0.040754   |
| hsa-miR-10b-5p    | 314971.7206        | 125113.9325       | 1.332          | 1.50E-11   | 6.00E-10   |
| hsa-miR-26b-5p    | 674.4738077        | 267.8411458       | 1.332          | 0.0012512  | 0.01082    |
| hsa-miR-499a-5p   | 971.1535769        | 385.6909175       | 1.3314         | 3.67E-05   | 0.00052764 |
| hsa-miR-499b-3p   | 971.1535769        | 385.6909175       | 1.3314         | 3.67E-05   | 0.00052764 |
| hsa-miR-122-5p    | 872572.3838        | 353458.405        | 1.3037         | 0.007675   | 0.041719   |
| hsa-miR-122b-3p   | 872572.3838        | 353458.405        | 1.3037         | 0.007675   | 0.041719   |
| hsa-miR-98-5p     | 1030.474219        | 421.286741        | 1.2894         | 3.89E-06   | 6.87E-05   |
| hsa-miR-487a-5p   | 804.9748311        | 335.414273        | 1.2641         | 1.07E-05   | 0.00016628 |
| hsa-miR-615-3p    | 258.1907638        | 107.8436425       | 1.2597         | 0.0031286  | 0.021479   |
| hsa-miR-100-5p    | 227907.3028        | 101455.4208       | 1.1676         | 2.08E-13   | 9.32E-12   |
| hsa-miR-412-5p    | 9154.764001        | 4138.574509       | 1.1453         | 2.32E-09   | 6.80E-08   |
| hsa-let-7d-5p     | 1232.55479         | 560.6098291       | 1.1372         | 0.0018884  | 0.014815   |
| hsa-miR-342-5p    | 1229.572916        | 562.8930135       | 1.1268         | 0.0073665  | 0.04122    |
| hsa-let-7g-5p     | 5860.982508        | 2716.638332       | 1.1093         | 6.19E-06   | 0.00010464 |
| hsa-miR-142-5p    | 834.065478         | 392.3905428       | 1.0879         | 0.0010937  | 0.0097917  |
| hsa-miR-425-5p    | 876.1026116        | 416.2585547       | 1.0741         | 0.0098192  | 0.048884   |

|                 |             |             |         |            |            |
|-----------------|-------------|-------------|---------|------------|------------|
| hsa-let-7i-5p   | 163986.7463 | 84241.54855 | 0.96098 | 3.50E-07   | 7.40E-06   |
| hsa-miR-195-3p  | 1377.610095 | 720.2856309 | 0.93519 | 0.0025303  | 0.019065   |
| hsa-miR-126-3p  | 90064.93347 | 49378.95011 | 0.86706 | 6.89E-07   | 1.38E-05   |
| hsa-miR-143-3p  | 14179.19695 | 7797.054007 | 0.86266 | 1.45E-05   | 0.00021591 |
| hsa-miR-222-3p  | 803420.4619 | 492844.4203 | 0.70502 | 0.00039287 | 0.0040955  |
| hsa-miR-6529-5p | 2869.178581 | 1806.079474 | 0.66777 | 0.008362   | 0.0445     |
| hsa-miR-127-3p  | 12443.99946 | 7910.101469 | 0.65372 | 0.0076476  | 0.041719   |
| hsa-miR-155-5p  | 6360.993633 | 4308.973385 | 0.56199 | 0.0056673  | 0.034503   |
| hsa-miR-224-5p  | 18028.03968 | 12620.91053 | 0.51451 | 0.0096936  | 0.048884   |
| hsa-miR-3184-3p | 604831.5734 | 428001.5495 | 0.49892 | 0.0029892  | 0.021071   |
| hsa-miR-423-5p  | 604831.5734 | 428004.4671 | 0.49891 | 0.0029904  | 0.021071   |
| hsa-miR-128-3p  | 37909.46805 | 28183.98833 | 0.42767 | 0.0057174  | 0.034531   |

---

| <b>Table S7. Echocardiography of I/R+NC/miR24-3p-antgomiR-EVs mice</b> |            |             |             |               |
|------------------------------------------------------------------------|------------|-------------|-------------|---------------|
|                                                                        | sham       | I/R         | NC-EVs      | antagomiR-EVs |
| IVS;d                                                                  | 0.70±0.03  | 0.74±0.08   | 0.53±0.13   | 0.75±0.03     |
| IVS;s                                                                  | 1.12±0.06  | 1.00±0.09   | 0.78±0.08   | 1.12±0.16     |
| LVID;d                                                                 | 3.99±0.07  | 3.92±0.40   | 3.78±0.31   | 4.05±0.42     |
| LVID;s                                                                 | 2.76±0.07  | 3.21±0.37   | 3.28±0.22   | 3.44±0.09     |
| LVPW;d                                                                 | 0.71±0.05  | 0.71±0.02   | 0.74±0.06   | 0.85±0.22     |
| LVPW;s                                                                 | 1.05±0.07  | 1.01±0.06   | 0.958±0.0   | 0.98±0.18     |
| EF                                                                     | 60.06±1.89 | 39.53±1.54  | 45.98±2.21  | 39.61±3.76    |
| FS                                                                     | 30.79±1.56 | 19.18±0.82  | 22.75±2.592 | 19.43±1.56    |
| LV Mass                                                                | 98.17±8.70 | 91.40±7.16  | 95.12±4.75  | 105.04±12.26  |
| LV Mass (Corrected)                                                    | 78.02±5.42 | 71.85±8.72  | 79.77±5.07  | 81.58±8.22    |
| LV Vol;d                                                               | 67.90±1.83 | 63.23±12.44 | 76.66±7.18  | 73.45±1.18    |
| LV Vol;s                                                               | 27.70±1.03 | 38.51±8.10  | 42.35±3.33  | 47.25±8.37    |

IVS;d: end-diastolic interventricular septal thickness; IVS;s: end-systolic interventricular septal thickness; LVID;d: left ventricular end-diastolic diameter; LVID;s: left ventricular end-systolic diameter; LVPW;d: end-diastolic left ventricular posterior wall thickness; LVPW;s: end-systolic left ventricular posterior wall thickness; EF: left ventricular ejection fraction; FS: left ventricular fractional shortening; LV Vol;d: end-diastolic left ventricular volume; LV Vol;s =end-systolic left ventricular volume.

| Table S8. Echocardiography of I/R+mouse-KLF2/vector-EVs mice |             |            |             |
|--------------------------------------------------------------|-------------|------------|-------------|
|                                                              | I/R         | KLF2-EVs   | vector-EVs  |
| IVS;d                                                        | 0.84±0.10   | 0.75±0.12  | 0.81±0.06   |
| IVS;s                                                        | 1.21±0.11   | 0.98±0.12  | 1.02±0.13   |
| LVID;d                                                       | 4.33±0.40   | 3.63±0.46  | 3.91±0.52   |
| LVID;s                                                       | 3.52±0.30   | 3.38±0.17  | 3.49±0.12   |
| LVPW;d                                                       | 0.81±0.09   | 0.79±0.02  | 0.86±0.23   |
| LVPW;s                                                       | 1.15±0.07   | 0.99±0.02  | 1.02±0.21   |
| EF                                                           | 39.94±1.33  | 43.55±1.81 | 39.25±2.63  |
| FS                                                           | 19.98±1.22  | 22.66±1.17 | 19.39±1.44  |
| LV Mass                                                      | 99.30±8.26  | 99.42±4.57 | 102.21±8.98 |
| LV Mass (Corrected)                                          | 79.58±8.27  | 89.19±4.98 | 92.31±7.82  |
| LV Vol;d                                                     | 65.32±10.21 | 75.11±6.81 | 71.54±1.8   |
| LV Vol;s                                                     | 41.15±8.04  | 42.53±3.83 | 45.52±7.98  |

IVS;d: end-diastolic interventricular septal thickness; IVS;s: end-systolic interventricular septal thickness; LVID;d: left ventricular end-diastolic diameter; LVID;s: left ventricular end-systolic diameter; LVPW;d: end-diastolic left ventricular posterior wall thickness; LVPW;s: end-systolic left ventricular posterior wall thickness; EF: left ventricular ejection fraction; FS: left ventricular fractional shortening; LV Vol;d: end-diastolic left ventricular volume; LV Vol;s: end-systolic left ventricular volume

**Table S9. Primer sequences for quantitative reverse transcriptase polymerase chain reaction (qRT-PCR)**

| gene           | species     | primer sequences        |                           |
|----------------|-------------|-------------------------|---------------------------|
|                |             | forward (5' -> 3')      | reverse (5' -> 3')        |
| CX3CR1         | mouse       | GAGTATGACGATTCTGCTGAGG  | CAGACCGAACGTGAAGACGAG     |
| CCR2           | mouse       | GGAGAAAAGCCAACTCCTTC    | AGGCAGTTGCAAAGGTACTG      |
| GAPDH          | mouse       | AGAACATCATCCCTGCCTCTACT | AGAACATCATCCCTGCCTCTACT   |
| Agtr1 $\alpha$ | mouse       | AACAGCTTGGTGGTGATCGTC   | CATAGCGGTATAGACAGCCCA     |
| TNF $\alpha$   | mouse       | AACTCCAGGCGGTGCCTATG    | TCCAGCTGCTCCTCCACTTG      |
| IL-10          | mouse       | ACTCTTCACCTGCTCCACTG    | GCTATGCTGCCTGCTCTTAC      |
| iNOS           | mouse       | TCACCTTCGAGGGCAGCCGA    | TCCGTGGCAAAGCGAGCCAG      |
| Arg1           | mouse       | CCAGATGTACCAGGATTCTC    | AGCAGGTAGCTGAAGGTCTC      |
| IL-1 $\beta$   | mouse       | AGCTTCAGGCAGGCAGTATC    | TCATCTCGGAGCCTGTAGTG      |
| IL-6           | mouse       | AAGTCCGGAGAGGAGACTTC    | TGGATGGTCTTGGTCCTTAG      |
| CD206          | mouse       | CTGCAGATGGGTGGGTTATT    | GGCATTGATGCTGCTGTTATG     |
| TGF $\beta$ 1  | mouse       | CGGAGAGCCCTGGATACCA     | GCCGCACACAGCAGTTCTT       |
| ICAM-1         | human       | TTGGGCATAGAGACCCCGTT    | GCACATTGCTCAGTTCATACACC   |
| KLF2           | human       | GCACGCACACAGGTGAGAAG    | ACCAGTCACAGTTTGGGAGGG     |
| TGF- $\beta$ 1 | human       | GGCCAGATCCTGTCCAAGC     | GTGGGTTTCCACCATTAGCAC     |
| IL-10          | human       | GACTTTAAGGGTTACCTGGGTTG | TCACATGCGCCTTGATGTCTG     |
| TNF $\alpha$   | human       | CCTCTCTCTAATCAGCCCTCTG  | GAGGACCTGGGAGTAGATGAG     |
| IL-1 $\beta$   | human       | ATGATGGCTTATTACAGTGGCAA | GTCGGAGATTTCGTAGCTGGA     |
| IL-6           | human       | ACTCACCTCTTCAGAACGAATTG | CCATCTTTGGAAGGTTTCAGGTTG  |
| GAPDH          | human       | GGAGCGAGATCCCTCCAAAAT   | GGCTGTTGTCATACTTCTCATGG   |
| miR24-3p       | mouse/human | AGTGGCTCAGTTCAGCA       | GTCCAGTTTTTTTTTTTTTCTGTTC |
| U6             | mouse/human | CGCTTCGGCAGCACATATAC    | AAATATGGAACGCTTCACGA      |

**Table S10. Primary antibodies used for western blotting**

| Antibody       | Source        | Catalog number | Host species |
|----------------|---------------|----------------|--------------|
| CD9            | Abcam         | ab92726        | rabbit       |
| ALIX           | Abcam         | ab186429       | rabbit       |
| TSG101         | Abcam         | ab125011       | rabbit       |
| CD63           | SBI           | EXOAB-CD63A-1  | rabbit       |
| GAPDH          | MultiSciences | ab011          | mouse        |
| CX3CR1         | Proteintech   | 13885-1-AP     | rabbit       |
| CCR2           | Abcam         | ab203128       | mouse        |
| Agtr1 $\alpha$ | Proteintech   | 25343-1-AP     | rabbit       |
| KLF2           | Abcam         | ab139699       | rabbit       |
| $\beta$ -actin | Servicebio    | GB11001        | rabbit       |

## Certificate of Analysis (COA)

**Product:** Exosome Depleted Fetal Bovine Serum

**Catalog No.:** C38010050, C38010100

**Lot No.:** 0054819

**Size:** 50ml, 100ml

**Storage Condition:** -10~-20°C

**Date of manufacture:** 2019.11.29

**Expiration Date:** 2024.02.28

**Date of report:** 2020.01.07

| Reference | Test                     | Specification | Result   | Pass |
|-----------|--------------------------|---------------|----------|------|
| 1         | pH                       | 7.0-8.0       | 7.75     | Ok   |
| 2.        | Osmolality( mOsm/kg)     | 270-345       | 306      | Ok   |
| 3.        | Sterility testing        | Negative      | Negative | Ok   |
| 4         | Mycoplasma testing       | Negative      | Negative | Ok   |
| 5         | Endotoxin testing(EU/ml) | ≤10           | <0.5     | Ok   |
| 6         | Plating efficiency test  | >80%          | Pass     | Ok   |
| 7         | 3 passage growth test    | >80%          | Pass     | Ok   |
| 8         | Residue of exosomes      | <3%           | Pass     | Ok   |

This document confirms that the above parameters have been tested and meet the quality control (QC) standard.

Signature: CH.DENG 2020.1.7  
QC Department

Date: 2020.01.07

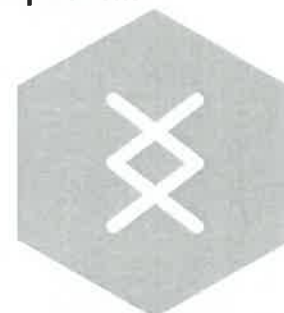

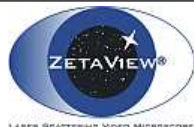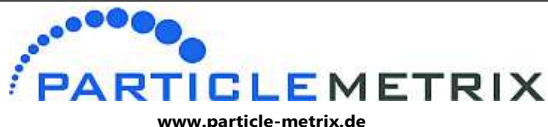

# Electrophoresis & Brownian Motion Video Analysis Laser Scattering Microscopy

Operator (Report): Administrator  
Video Operator: Administrator

## Sample Parameters

Sample Name: A186-01-01  
Comment: Sample Remarks0:  
Sample Remarks1:  
Sample Remarks2:  
Electrolyte:  
Temperature: 22.94 °C sensed  
pH 7.0 entered  
Conductivity: 0.00 µS/cm entered

## Result (sizes in nm)

|              | Number | Concentration | Volume |
|--------------|--------|---------------|--------|
| Median (X50) | 84.3   | 84.3          | 145.7  |
| Span         | 43.0   | 43.0          | 89.3   |

Concentration: 1.7E+7 Particles / mL  
Dilution Factor: 400  
Original Concentration: 7.0E+9 Particles / mL

## Quality

Average Counted Particles per Frame: 190  
Number of Traced Particles: 2359

## Measurement Parameters

Cell S/N: NTA

## Measurement Mode: Size Distribution 4 Cycles

11 Positions

## Analysis Parameters

Max Area: 1000, Min Area: 5, Min Brightness: 20

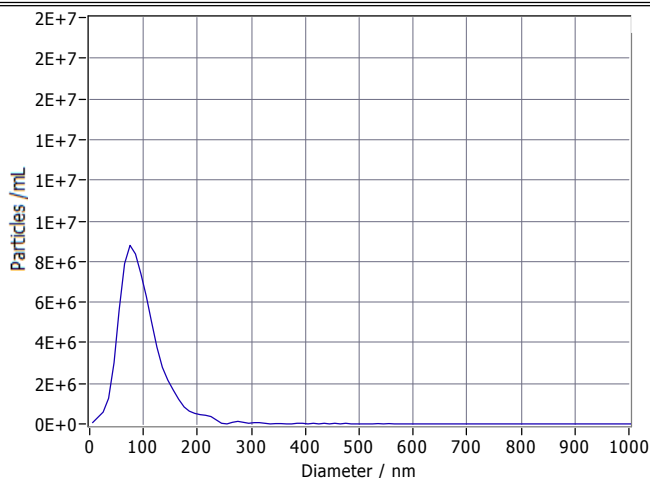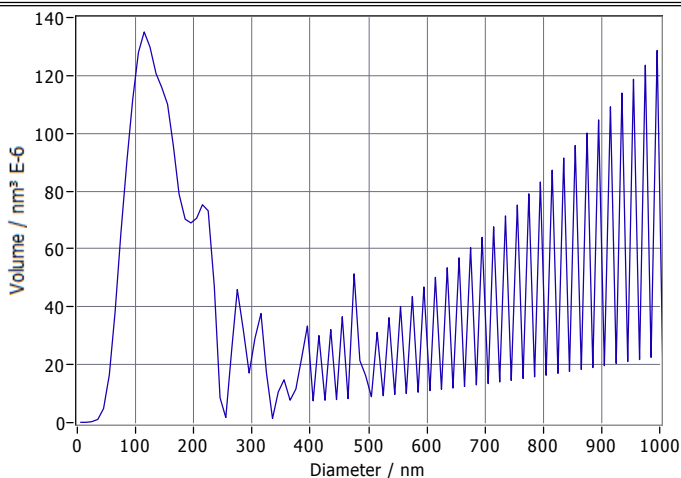

## Peak Analysis (Concentration)

| Diameter / nm | Particles/mL | FWHM / nm | Percentage |
|---------------|--------------|-----------|------------|
| 81.4          | 8.5E+6       | 69.8      | 97.4       |
| 303.7         | 5.5E+4       | 23.6      | 0.7        |
| 453.1         | 1.9E+4       | 109.0     | 0.1        |
| 356.8         | 1.7E+4       | 10.0      | 0.0        |
| 439.8         | 1.4E+4       | 0.0       | 0.0        |

## X Values

|        | Number | Concentration | Volume |
|--------|--------|---------------|--------|
| X10    | 48.2   | 48.2          | 82.9   |
| X50    | 84.3   | 84.3          | 145.7  |
| X90    | 143.5  | 143.5         | 287.1  |
| Span   | 1.1    | 1.1           | 1.4    |
| Mean   | 97.1   | 97.1          | 174.9  |
| StdDev | 43.0   | 43.0          | 89.3   |

## Comment

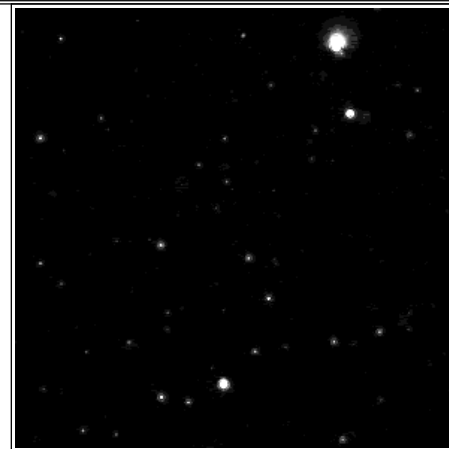

Analyzed Video: E:\NTA Measurements\20200629\_0002\_A186-01-01\_size.avi



# Electrophoresis & Brownian Motion Video Analysis Laser Scattering Microscopy

Operator (Report): Administrator  
Video Operator: Administrator

## Sample Parameters

Sample Name: A186-01-02  
Comment: Sample Remarks0:  
Sample Remarks1:  
Sample Remarks2:  
Electrolyte:  
Temperature: 23.39 °C sensed  
pH 7.0 entered  
Conductivity: 0.00 µS/cm entered

## Result (sizes in nm)

|              | Number | Concentration | Volume |
|--------------|--------|---------------|--------|
| Median (X50) | 82.4   | 82.4          | 143.3  |
| Span         | 41.7   | 41.7          | 70.2   |

Concentration: 6.7E+7 Particles / mL  
Dilution Factor: 400  
Original Concentration: 2.7E+10 Particles / mL

## Quality

Average Counted Particles per Frame: 181  
Number of Traced Particles: 2217

## Measurement Parameters

Cell S/N: NTA

## Measurement Mode: Size Distribution 4 Cycles

11 Positions

## Analysis Parameters

Max Area: 1000, Min Area: 5, Min Brightness: 20

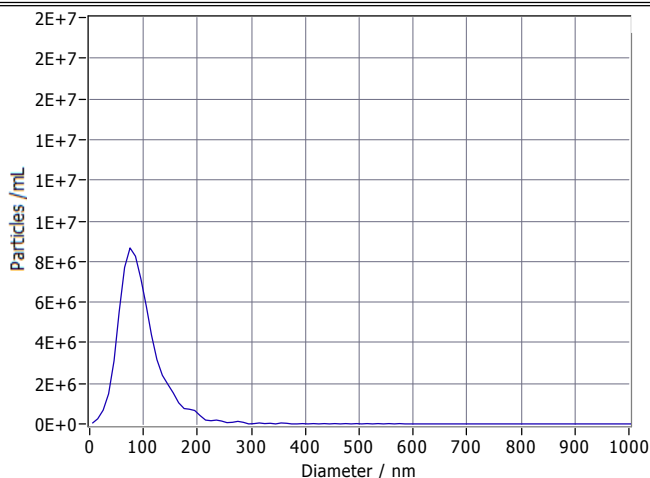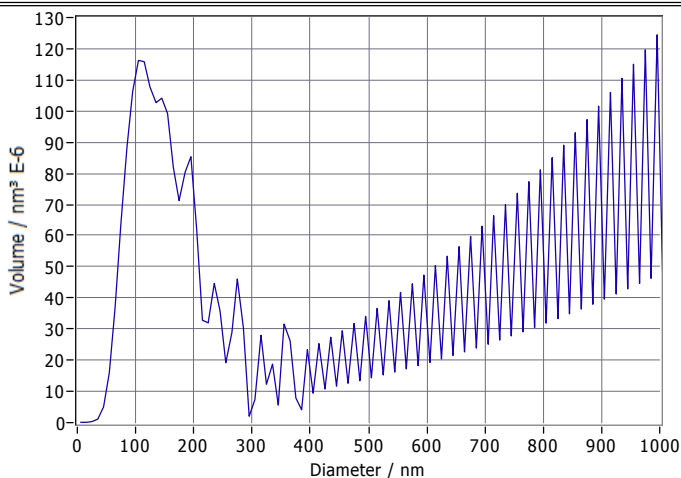

## Peak Analysis (Concentration)

| Diameter / nm | Particles/mL | FWHM / nm | Percentage |
|---------------|--------------|-----------|------------|
| 80.3          | 8.4E+6       | 65.4      | 97.5       |
| 362.2         | 3.4E+4       | 106.5     | 0.3        |
| 403.5         | 1.0E+4       | 10.0      | 0.0        |
| 561.4         | 8.5E+3       | 30.0      | 0.1        |
| 445.3         | 7.9E+3       | 11.6      | 0.2        |

## X Values

|        | Number | Concentration | Volume |
|--------|--------|---------------|--------|
| X10    | 47.3   | 47.3          | 80.5   |
| X50    | 82.4   | 82.4          | 143.3  |
| X90    | 142.9  | 142.9         | 260.6  |
| Span   | 1.2    | 1.2           | 1.3    |
| Mean   | 95.1   | 95.1          | 162.6  |
| StdDev | 41.7   | 41.7          | 70.2   |

## Comment

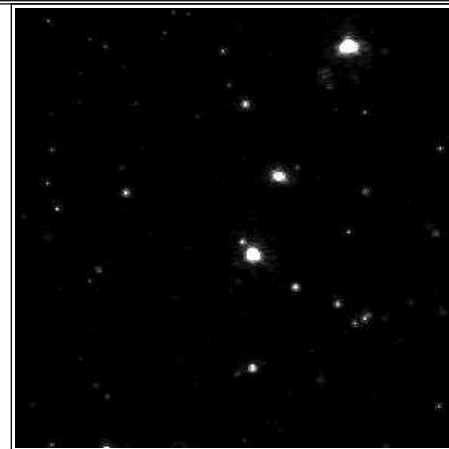

(Signature)

Analyzed Video: E:\NTA Measurements\20200629\_0003\_A186-01-02\_size.avi



# Electrophoresis & Brownian Motion Video Analysis Laser Scattering Microscopy

Operator (Report): Administrator  
Video Operator: Administrator

## Sample Parameters

Sample Name: A186-02  
Comment: Sample Remarks0:  
Sample Remarks1:  
Sample Remarks2:  
Electrolyte:  
Temperature: 23.82 °C sensed  
pH 7.0 entered  
Conductivity: 0.00 µS/cm entered

## Result (sizes in nm)

|              | Number | Concentration | Volume |
|--------------|--------|---------------|--------|
| Median (X50) | 79.1   | 79.1          | 132.8  |
| Span         | 38.3   | 38.3          | 65.3   |

Concentration: 9.5E+7 Particles / mL  
Dilution Factor: 400  
Original Concentration: 3.8E+10 Particles / mL

## Quality

Average Counted Particles per Frame: 258  
Number of Traced Particles: 2803

## Measurement Parameters

Cell S/N: NTA

## Measurement Mode: Size Distribution 4 Cycles

11 Positions

## Analysis Parameters

Max Area: 1000, Min Area: 5, Min Brightness: 20

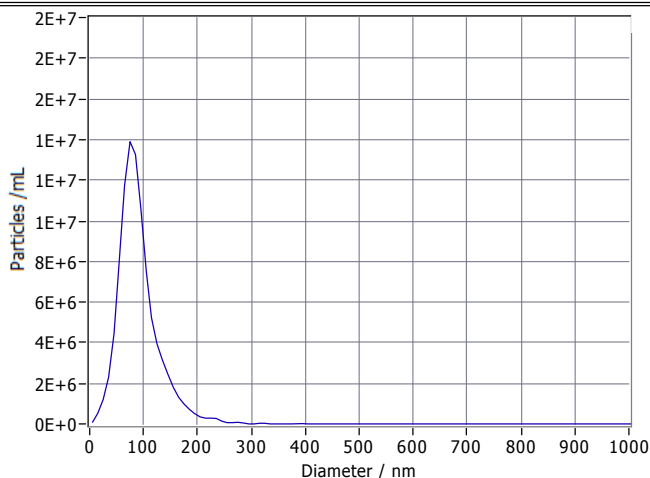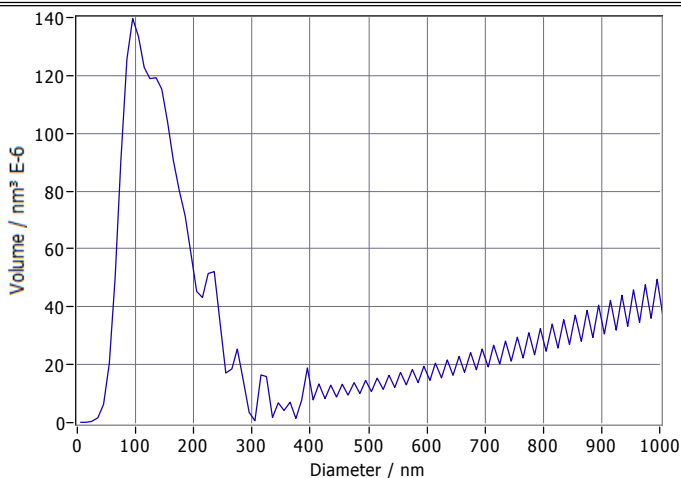

## Peak Analysis (Concentration)

| Diameter / nm | Particles/mL | FWHM / nm | Percentage |
|---------------|--------------|-----------|------------|
| 78.6          | 1.4E+7       | 55.2      | 99.0       |
| 315.5         | 3.4E+4       | 10.0      | 0.0        |
| 403.8         | 9.0E+3       | 15.6      | 0.1        |
| 445.3         | 6.5E+3       | 14.8      | 0.1        |
| 354.8         | 6.1E+3       | 20.0      | 0.0        |

## X Values

|        | Number | Concentration | Volume |
|--------|--------|---------------|--------|
| X10    | 46.3   | 46.3          | 75.9   |
| X50    | 79.1   | 79.1          | 132.8  |
| X90    | 134.7  | 134.7         | 231.8  |
| Span   | 1.1    | 1.1           | 1.2    |
| Mean   | 90.8   | 90.8          | 150.6  |
| StdDev | 38.3   | 38.3          | 65.3   |

## Comment

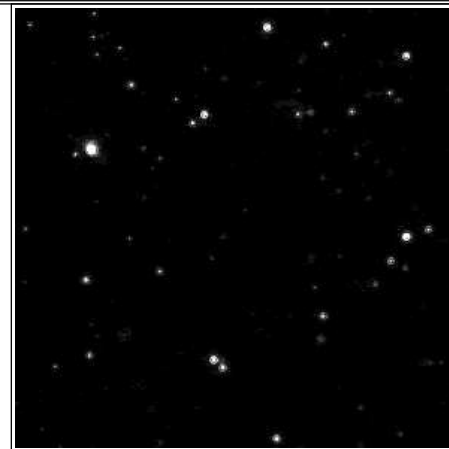

(Signature)

Analyzed Video: E:\NTA Measurements\20200629\_0004\_A186-02\_size.avi

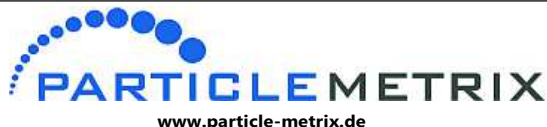

# Electrophoresis & Brownian Motion Video Analysis Laser Scattering Microscopy

Operator (Report): Administrator  
Video Operator: Administrator

## Sample Parameters

Sample Name: A186-03  
Comment: Sample Remarks0:  
Sample Remarks1:  
Sample Remarks2:  
Electrolyte:  
Temperature: 24.29 °C sensed  
pH 7.0 entered  
Conductivity: 0.00 µS/cm entered

## Result (sizes in nm)

|              | Number | Concentration | Volume |
|--------------|--------|---------------|--------|
| Median (X50) | 86.7   | 86.7          | 143.8  |
| Span         | 42.0   | 42.0          | 74.3   |

Concentration: 6.5E+7 Particles / mL  
Dilution Factor: 800  
Original Concentration: 5.2E+10 Particles / mL

## Quality

Average Counted Particles per Frame: 177  
Number of Traced Particles: 2505

## Measurement Parameters

Cell S/N: NTA

## Measurement Mode: Size Distribution 4 Cycles

11 Positions

## Analysis Parameters

Max Area: 1000, Min Area: 5, Min Brightness: 20

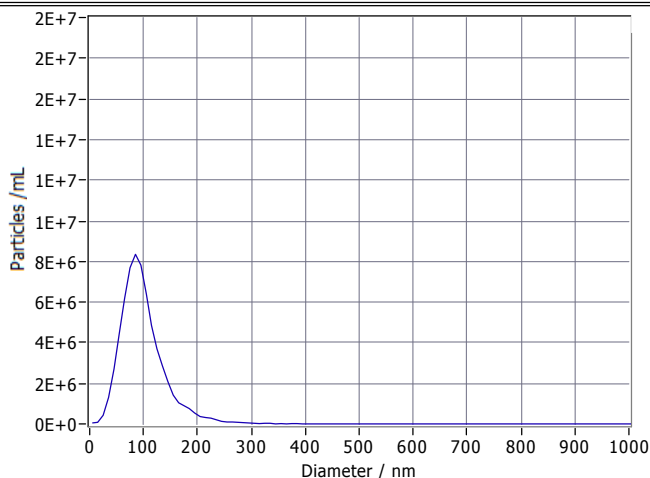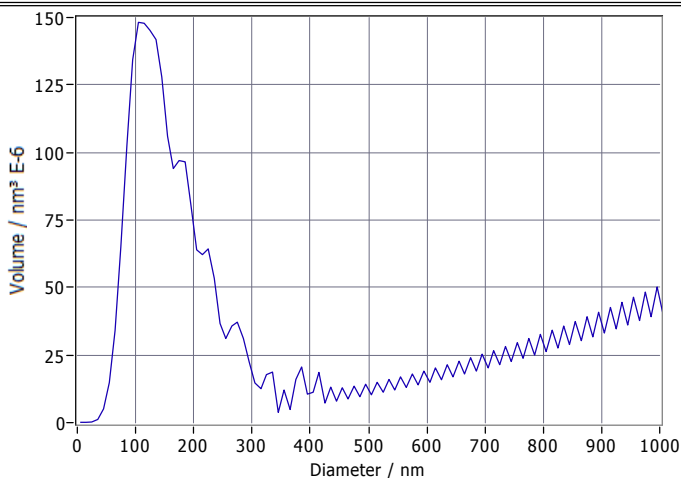

## Peak Analysis (Concentration)

| Diameter / nm | Particles/mL | FWHM / nm | Percentage |
|---------------|--------------|-----------|------------|
| 86.2          | 8.3E+6       | 67.0      | 98.5       |
| 303.4         | 2.9E+4       | 30.7      | 0.3        |
| 409.2         | 1.0E+4       | 65.5      | 0.1        |
| 359.3         | 9.8E+3       | 30.0      | 0.1        |
| 463.8         | 4.6E+3       | 30.0      | 0.0        |

## X Values

|        | Number | Concentration | Volume |
|--------|--------|---------------|--------|
| X10    | 49.4   | 49.4          | 83.6   |
| X50    | 86.7   | 86.7          | 143.8  |
| X90    | 144.8  | 144.8         | 265.8  |
| Span   | 1.1    | 1.1           | 1.3    |
| Mean   | 98.9   | 98.9          | 166.6  |
| StdDev | 42.0   | 42.0          | 74.3   |

## Comment

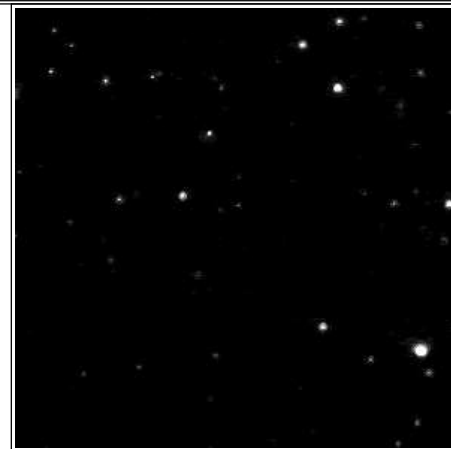

(Signature)

Analyzed Video: E:\NTA Measurements\20200629\_0005\_A186-03\_size.avi
